# Supplementary material for: Exome-Wide Association Study Reveals Several Susceptibility Genes and Pathways Associated With Acute Coronary Syndromes in Han Chinese
Source: Front Genet. 2020 Apr 9;11:336. doi: 10.3389/fgene.2020.00336 (PMC7160370; doi:10.3389/fgene.2020.00336)
Supplement: Supplementary file 1 [file Data_Sheet_1.XLSX]

## Sheet: summary statistics in discovery
CHROM	POS	REF	ALT	N_INFORMATIVE	Test	Beta	SE	Pvalue
19	52825095	C	T	3604	19:52825095	2.42724	0.230408	5.98733e-26
19	47226434	C	T	3604	19:47226434	1.35748	0.134642	6.62548e-24
19	34706531	A	G	3604	19:34706531	-2.69384	0.433939	5.37032e-10
11	58125620	C	T	3604	11:58125620	0.371586	0.0726183	3.10474e-07
7	99170144	T	C	3604	7:99170144	-2.9886	0.603523	7.34825e-07
10	75156333	G	A	3604	10:75156333	-3.84086	0.803092	1.73051e-06
11	123810502	A	G	3604	11:123810502	-2.02219	0.427228	2.20906e-06
3	151535235	A	G	3604	3:151535235	-2.94316	0.622387	2.25821e-06
7	48315825	C	T	3604	7:48315825	-2.62423	0.580133	6.08253e-06
1	1431163	G	A	3604	1:1431163	-3.69027	0.818125	6.4631e-06
15	75015305	C	T	3604	15:75015305	-0.382514	0.0858562	8.37833e-06
16	84514305	C	G	3604	16:84514305	0.867904	0.196053	9.55991e-06
3	133302985	C	T	3604	3:133302985	-2.9297	0.662057	9.63748e-06
19	47856763	G	A	3604	19:47856763	5794.83	1321.07	1.15209e-05
14	68249803	A	C	3604	14:68249803	-1.8708	0.428696	1.27751e-05
19	36159524	G	A	3604	19:36159524	-1.52818	0.362514	2.49198e-05
4	89671591	A	C	3604	4:89671591	-2.40479	0.577263	3.10197e-05
2	204305568	A	G	3604	2:204305568	-1.43353	0.34899	3.99677e-05
7	155461950	T	C	3604	7:155461950	0.25487	0.0627973	4.93655e-05
12	57627816	G	A	3604	12:57627816	0.525261	0.130678	5.83164e-05
15	89679515	G	A	3604	15:89679515	0.246364	0.0613135	5.8668e-05
17	80789026	G	C	3604	17:80789026	-3.06231	0.77806	8.29098e-05
6	31176335	C	T	3604	6:31176335	-0.284113	0.0722562	8.42326e-05
6	24448111	C	T	3604	6:24448111	-1.4247	0.37254	0.000131157
6	29785776	C	T	3604	6:29785776	-0.328495	0.0860033	0.000133688
10	135000159	G	A	3604	10:135000159	0.233915	0.0612637	0.000134447
4	181288587	G	T	3604	4:181288587	0.242865	0.0637483	0.000139102
6	3019863	A	G	3604	6:3019863	1.50047	0.394865	0.000144729
4	58694609	A	G	3604	4:58694609	-0.231005	0.0609263	0.000149707
7	155531080	A	G	3604	7:155531080	0.237558	0.0628984	0.000158817
9	4292083	G	A	3604	9:4292083	-0.230268	0.061477	0.000179968
6	29446632	T	G	3604	6:29446632	0.236261	0.0631236	0.000181963
1	6313963	C	T	3604	1:6313963	6906.57	1850.21	0.00018932
1	222802376	A	G	3604	1:222802376	-0.239493	0.0643086	0.000195998
19	1785547	G	A	3604	19:1785547	13714.2	3686.09	0.000198817
6	29763087	A	T	3604	6:29763087	-0.329719	0.0887777	0.000204024
6	167079111	A	G	3604	6:167079111	0.223676	0.0605477	0.000220562
14	79451465	T	C	3604	14:79451465	0.217857	0.0593288	0.000240632
3	142982899	A	G	3604	3:142982899	0.32974	0.0898273	0.000241772
6	26316982	A	G	3604	6:26316982	-0.473519	0.129531	0.000256542
6	106829537	C	T	3604	6:106829537	0.220629	0.0605291	0.000267389
19	53644456	A	G	3604	19:53644456	-3.91816	1.0761	0.000271512
2	141113924	G	T	3604	2:141113924	-2.93909	0.810514	0.000287622
17	49362617	G	A	3604	17:49362617	-0.827322	0.22858	0.000295288
6	30365740	T	C	3604	6:30365740	-0.252482	0.0700011	0.000309953
12	7527124	A	G	3604	12:7527124	0.355988	0.0995093	0.000346986
13	48162558	C	A	3604	13:48162558	0.483535	0.135256	0.000350285
11	58480331	G	A	3604	11:58480331	-2.5221	0.706854	0.000359638
6	33745071	T	C	3604	6:33745071	0.250253	0.0713393	0.000451624
10	116068193	G	A	3604	10:116068193	0.951532	0.271766	0.000463
22	24726329	C	T	3604	22:24726329	-1.48337	0.424303	0.000472241
17	37074932	C	T	3604	17:37074932	-0.369025	0.105612	0.000475535
3	122630827	A	G	3604	3:122630827	4108.35	1176.8	0.000481013
2	168115568	T	C	3604	2:168115568	12756.7	3654.9	0.00048249
15	65703625	C	G	3604	15:65703625	0.522569	0.15065	0.000522865
7	101259504	C	T	3604	7:101259504	-0.550266	0.158693	0.000525333
10	106401380	G	A	3604	10:106401380	0.990244	0.286215	0.000540606
4	128628066	G	A	3604	4:128628066	-1.58105	0.458337	0.000561551
1	205713378	A	G	3604	1:205713378	0.273619	0.0794383	0.000572282
6	29618366	G	T	3604	6:29618366	0.897949	0.26092	0.000578574
6	29624112	A	C	3604	6:29624112	0.897949	0.26092	0.000578574
10	97096921	C	T	3604	10:97096921	9625.09	2827.96	0.000665174
22	50960235	G	A	3604	22:50960235	-3.52277	1.03728	0.00068339
17	56271094	G	C	3604	17:56271094	-0.364671	0.107518	0.000694549
16	20975505	T	C	3604	16:20975505	-0.704888	0.208774	0.000734629
6	35923246	T	C	3604	6:35923246	0.217761	0.0645167	0.000737438
10	56177015	C	T	3604	10:56177015	0.324644	0.0962115	0.000740099
17	61619795	C	T	3604	17:61619795	-0.797404	0.236479	0.000746297
9	4763176	C	T	3604	9:4763176	-0.246036	0.0734855	0.000813705
11	123813795	T	C	3604	11:123813795	-0.260224	0.0778733	0.000832862
11	123814356	G	A	3604	11:123814356	-0.260224	0.0778733	0.000832862
11	123814478	A	G	3604	11:123814478	-0.260224	0.0778733	0.000832862
1	171688351	A	G	3604	1:171688351	-1.56713	0.469003	0.000833526
16	56988044	C	T	3604	16:56988044	-0.229376	0.0687854	0.00085402
6	38704868	C	A	3604	6:38704868	-1.30833	0.392694	0.000863261
1	32158374	T	C	3604	1:32158374	0.210407	0.063225	0.000874988
11	62297759	T	C	3604	11:62297759	1.09145	0.328374	0.000888004
9	74332970	G	A	3604	9:74332970	-0.308467	0.0930492	0.000916097
5	71549048	C	T	3604	5:71549048	2.28291	0.689139	0.000924024
13	51116901	G	T	3604	13:51116901	0.660858	0.199825	0.000942401
1	205773652	T	C	3604	1:205773652	0.233493	0.0706568	0.000951085
17	17425684	C	T	3604	17:17425684	0.852911	0.258146	0.000953199
19	5711910	C	T	3604	19:5711910	9226.43	2793.38	0.000956694
9	4289050	C	A	3604	9:4289050	-0.199359	0.060491	0.000981824
4	147825919	C	T	3604	4:147825919	0.197778	0.0600459	0.000988517
11	113194069	G	C	3604	11:113194069	-1.10972	0.337023	0.000992301
19	35622368	C	T	3604	19:35622368	-1.4875	0.451925	0.000996628
4	147824864	A	G	3604	4:147824864	0.197292	0.0599839	0.00100514
1	161697072	G	C	3604	1:161697072	-0.198295	0.0603597	0.001019
3	108634973	C	A	3604	3:108634973	0.259898	0.0791259	0.00102123
1	113255212	T	G	3604	1:113255212	-0.198291	0.0603818	0.00102363
18	44585943	C	G	3604	18:44585943	-1.35449	0.415221	0.00110591
2	61304072	A	G	3604	2:61304072	-1.67082	0.512608	0.00111626
15	75077367	C	A	3604	15:75077367	-0.271133	0.0832034	0.00111932
9	23425236	G	A	3604	9:23425236	-0.247047	0.0758596	0.0011274
6	33138955	A	G	3604	6:33138955	0.317705	0.0976511	0.00114005
9	107586753	C	T	3604	9:107586753	-0.21532	0.0665095	0.00120613
5	30946644	G	A	3604	5:30946644	-0.199723	0.0617563	0.00122051
20	62200017	G	A	3604	20:62200017	-3.7144	1.14956	0.0012329
19	41944237	C	T	3604	19:41944237	-0.190388	0.0589664	0.00124327
12	52986253	T	C	3604	12:52986253	1.87554	0.582447	0.00128144
17	73897344	G	A	3604	17:73897344	-0.539156	0.167743	0.00130816
20	39986085	C	A	3604	20:39986085	-0.191912	0.0597187	0.00131086
7	94463888	T	C	3604	7:94463888	-0.199993	0.0622544	0.00131581
7	137686406	G	A	3604	7:137686406	-1.30954	0.408159	0.00133468
6	74493432	C	A	3604	6:74493432	-0.188907	0.058956	0.00135439
6	148341758	G	A	3604	6:148341758	0.266312	0.0832632	0.00138176
7	10276673	G	A	3604	7:10276673	-0.188759	0.0592189	0.0014352
2	191235991	G	A	3604	2:191235991	-4.53704	1.42982	0.00150793
6	36269725	A	G	3604	6:36269725	-0.374558	0.118169	0.00152612
10	133514014	A	C	3604	10:133514014	-0.218849	0.0690739	0.00153321
14	59790813	C	T	3604	14:59790813	-0.190235	0.0601697	0.00156883
6	29745593	T	C	3604	6:29745593	-0.265729	0.0840965	0.00157871
15	75116023	G	A	3604	15:75116023	-2.07752	0.657975	0.00159158
3	121800487	A	C	3604	3:121800487	0.210463	0.066758	0.00161805
19	40886680	A	C	3604	19:40886680	-1.92314	0.611572	0.00166322
17	56270442	A	G	3604	17:56270442	-0.323997	0.103114	0.00167734
7	28996944	C	T	3604	7:28996944	0.298301	0.095028	0.00169474
18	61387312	A	G	3604	18:61387312	-0.191404	0.060982	0.00169699
18	61387333	A	T	3604	18:61387333	-0.191404	0.060982	0.00169699
18	61387389	A	G	3604	18:61387389	-0.191404	0.060982	0.00169699
16	56989590	C	T	3604	16:56989590	-0.249226	0.0795079	0.00172083
1	117660754	C	T	3604	1:117660754	0.434801	0.138737	0.00172447
16	56993324	C	A	3604	16:56993324	-0.248718	0.0794687	0.00174946
15	84315884	T	C	3604	15:84315884	0.446676	0.142856	0.00176743
12	71634794	G	A	3604	12:71634794	0.217487	0.0696057	0.00178074
1	58999853	T	C	3604	1:58999853	-0.700469	0.224217	0.00178373
1	230846449	T	A	3604	1:230846449	-1.60638	0.515013	0.00181396
11	27487992	C	T	3604	11:27487992	-0.184652	0.0593205	0.00185334
10	102707593	A	G	3604	10:102707593	-1.32875	0.428649	0.00193622
7	137327157	G	A	3604	7:137327157	-0.374531	0.121006	0.0019672
14	32353250	C	T	3604	14:32353250	0.184391	0.0596748	0.00200199
16	77775672	A	G	3604	16:77775672	-0.27063	0.0876141	0.00200911
4	29755511	C	A	3604	4:29755511	0.199426	0.0646737	0.0020453
4	91826328	C	T	3604	4:91826328	0.193052	0.0626504	0.00206022
1	205764640	A	G	3604	1:205764640	0.218928	0.0710898	0.0020728
12	10244654	T	C	3604	12:10244654	0.186447	0.0605824	0.0020869
19	49363674	T	C	3604	19:49363674	-1.63228	0.530612	0.00209638
6	147701133	G	T	3604	6:147701133	0.187192	0.0608938	0.00211156
1	53974913	C	T	3604	1:53974913	-2.01696	0.658898	0.00220522
16	16177275	G	A	3604	16:16177275	0.408302	0.133492	0.00222357
3	51978529	C	T	3604	3:51978529	-1.58044	0.518759	0.00231456
19	50796922	G	A	3604	19:50796922	-2.82757	0.929397	0.00234727
1	161701810	G	A	3604	1:161701810	-0.183104	0.0602058	0.00235561
16	30408765	T	C	3604	16:30408765	0.349767	0.115099	0.00237501
11	124266877	A	C	3604	11:124266877	-3.15617	1.03971	0.00240038
17	73917372	A	G	3604	17:73917372	-0.503693	0.166	0.00241096
6	26233387	G	A	3604	6:26233387	-0.217135	0.0715982	0.00242383
13	51105334	G	A	3604	13:51105334	0.57691	0.190451	0.00245222
9	139890130	G	T	3604	9:139890130	-0.535431	0.176851	0.0024652
4	12778849	G	A	3604	4:12778849	0.182802	0.0604001	0.00247392
7	28391182	C	T	3604	7:28391182	0.182181	0.0602099	0.00248012
16	29673203	C	T	3604	16:29673203	0.181001	0.0598567	0.00249538
6	30753146	G	A	3604	6:30753146	0.189946	0.06287	0.00251735
6	101168439	G	A	3604	6:101168439	-0.183664	0.0607991	0.00252074
19	7831628	G	A	3604	19:7831628	0.245231	0.0812708	0.00254904
9	22115959	G	A	3604	9:22115959	-0.197706	0.0655655	0.00256644
5	112769840	C	G	3604	5:112769840	-0.472289	0.15663	0.00256708
2	175183905	G	A	3604	2:175183905	0.191163	0.0634705	0.00259673
17	32982929	C	T	3604	17:32982929	-0.180877	0.0600652	0.0026009
1	38329999	C	G	3604	1:38329999	-1.77656	0.589986	0.00260219
20	35128751	G	A	3604	20:35128751	-0.347034	0.115388	0.00263377
1	177908893	A	G	3604	1:177908893	-0.922331	0.306824	0.00264657
21	37617630	G	T	3604	21:37617630	1.96845	0.655167	0.00266015
19	41903220	G	A	3604	19:41903220	-0.177316	0.059058	0.00267855
17	37829778	T	C	3604	17:37829778	-0.62996	0.20991	0.00269016
9	22062134	G	T	3604	9:22062134	0.311653	0.103856	0.00269249
4	44700642	G	A	3604	4:44700642	1.3238	0.441298	0.00270165
1	152692074	G	C	3604	1:152692074	-0.246352	0.0821782	0.00271954
1	152692472	A	C	3604	1:152692472	-0.246352	0.0821782	0.00271954
6	33762242	G	A	3604	6:33762242	0.391159	0.130535	0.00273013
12	93011711	A	G	3604	12:93011711	-0.181415	0.0606014	0.00275722
5	90151589	A	G	3604	5:90151589	0.178776	0.0597418	0.00276726
12	93870771	C	T	3604	12:93870771	-1.52351	0.509264	0.00277517
1	222823529	C	A	3604	1:222823529	-0.18139	0.0606401	0.00277833
1	215916563	G	A	3604	1:215916563	-0.286078	0.0957347	0.0028059
6	147396745	C	T	3604	6:147396745	-0.180892	0.0605612	0.00281802
17	71380062	G	A	3604	17:71380062	1.96561	0.658245	0.0028253
8	124765702	G	A	3604	8:124765702	0.187222	0.0628197	0.00287962
2	160710153	T	G	3604	2:160710153	-0.232607	0.0780563	0.00288261
16	55245037	G	A	3604	16:55245037	-0.491837	0.165227	0.00291331
6	29396217	T	C	3604	6:29396217	-0.520249	0.174778	0.00291446
1	88035857	A	G	3604	1:88035857	-0.18411	0.0618661	0.00292088
6	151673577	A	G	3604	6:151673577	-2.11362	0.710402	0.00292753
6	161018174	T	C	3604	6:161018174	0.265347	0.0892227	0.00293962
8	21479725	T	C	3604	8:21479725	-0.176079	0.0592447	0.00295809
21	22861778	T	C	3604	21:22861778	0.408965	0.137698	0.00297792
19	49360716	G	A	3604	19:49360716	0.419567	0.141485	0.00302245
5	66538400	G	A	3604	5:66538400	-0.176749	0.0596184	0.00303009
6	105991031	A	G	3604	6:105991031	-0.183143	0.0617815	0.00303306
12	108970462	C	T	3604	12:108970462	-0.210169	0.0710157	0.0030816
13	96599295	A	G	3604	13:96599295	-2.03721	0.688586	0.00309102
6	29471934	C	T	3604	6:29471934	-0.51826	0.17518	0.00309199
12	52986187	C	T	3604	12:52986187	0.176591	0.059752	0.00312266
4	5527214	G	C	3604	4:5527214	-0.503651	0.170428	0.00312453
3	48474024	C	T	3604	3:48474024	1.21373	0.411019	0.00314732
21	28338298	C	G	3604	21:28338298	1.16876	0.396201	0.00317859
1	113190807	A	C	3604	1:113190807	0.172503	0.058509	0.00319502
2	119603999	C	A	3604	2:119603999	1.71485	0.581735	0.00320022
12	52992812	C	T	3604	12:52992812	0.175766	0.0597612	0.00327016
2	24413298	A	G	3604	2:24413298	0.214591	0.0729621	0.00327017
7	128497224	G	T	3604	7:128497224	-0.923409	0.314233	0.00329681
1	215914826	T	C	3604	1:215914826	-0.280875	0.0955916	0.00330042
13	51111355	T	G	3604	13:51111355	0.595977	0.202863	0.00330514
5	73311323	C	A	3604	5:73311323	0.274897	0.0936343	0.00332622
4	23123307	T	C	3604	4:23123307	0.175874	0.0599437	0.00334638
6	32298814	C	A	3604	6:32298814	-0.256539	0.0874684	0.00335781
6	32299822	G	A	3604	6:32299822	-0.256539	0.0874684	0.00335781
9	99413954	T	G	3604	9:99413954	-0.757711	0.258603	0.00338948
8	117129410	C	T	3604	8:117129410	-0.180775	0.0617472	0.00341513
19	13876922	G	A	3604	19:13876922	-2.07432	0.708921	0.00343327
4	10104670	A	G	3604	4:10104670	-0.171718	0.058728	0.00345613
20	17622471	C	T	3604	20:17622471	-0.989622	0.338937	0.00350279
6	29395180	A	G	3604	6:29395180	-0.514587	0.176425	0.00353709
6	27834877	T	C	3604	6:27834877	-0.604211	0.207396	0.00357614
12	102342103	G	A	3604	12:102342103	0.185061	0.0636248	0.00363009
9	125288893	C	T	3604	9:125288893	-0.184963	0.0636064	0.00363822
3	43230723	C	G	3604	3:43230723	0.283103	0.0974362	0.00366646
10	63450379	G	A	3604	10:63450379	-0.315794	0.108693	0.00366823
12	103306579	C	T	3604	12:103306579	-0.672071	0.231452	0.00368763
19	11202306	G	T	3604	19:11202306	-1.38554	0.477806	0.00373418
12	122395777	G	A	3604	12:122395777	0.21087	0.0727646	0.00375582
4	111708287	A	C	3604	4:111708287	0.170355	0.0587921	0.00376041
20	3171337	C	T	3604	20:3171337	1.49391	0.515952	0.00378634
15	24152993	A	G	3604	15:24152993	-0.178754	0.061746	0.00379171
3	175863867	G	T	3604	3:175863867	-0.379725	0.13117	0.00379282
1	169762807	T	G	3604	1:169762807	-0.223642	0.0772631	0.00379702
2	27384579	G	A	3604	2:27384579	0.171845	0.0593765	0.00380175
4	3494600	G	A	3604	4:3494600	0.175	0.0605359	0.00384215
15	84581995	C	T	3604	15:84581995	-1.50501	0.520618	0.00384241
18	63112979	T	C	3604	18:63112979	0.172589	0.0597626	0.00387802
15	97768422	G	A	3604	15:97768422	-0.199767	0.0691994	0.00389135
10	118215261	G	T	3604	10:118215261	1.40792	0.487813	0.00389934
5	96503378	T	C	3604	5:96503378	-2.25382	0.78109	0.0039082
15	61329788	A	G	3604	15:61329788	0.231695	0.0803052	0.00391189
4	111710169	T	C	3604	4:111710169	0.169306	0.0587386	0.003947
19	46119772	C	G	3604	19:46119772	-2.49877	0.867337	0.00396459
1	17657534	A	G	3604	1:17657534	-0.173387	0.0602195	0.00398624
19	35828903	G	A	3604	19:35828903	-1.61949	0.562522	0.0039895
9	107647655	G	A	3604	9:107647655	-0.382434	0.132862	0.00399642
19	11347493	T	C	3604	19:11347493	0.187918	0.0653769	0.00404817
19	41869392	T	C	3604	19:41869392	-0.169346	0.0590379	0.00412512
14	90778748	C	T	3604	14:90778748	0.686219	0.23925	0.00412806
2	242513552	A	G	3604	2:242513552	-0.229021	0.080118	0.00425586
14	39871004	C	G	3604	14:39871004	1.36538	0.477799	0.0042681
17	59533868	G	C	3604	17:59533868	-0.179139	0.0627077	0.00428025
11	118531335	T	C	3604	11:118531335	-0.739606	0.258964	0.00428993
16	4864570	C	T	3604	16:4864570	-0.35311	0.12374	0.00432208
11	102495998	G	T	3604	11:102495998	-0.223101	0.07826	0.00436144
3	17877828	T	G	3604	3:17877828	-0.188015	0.0659593	0.00436538
9	107657070	G	A	3604	9:107657070	-0.379048	0.133002	0.00437282
1	94496053	G	A	3604	1:94496053	0.348592	0.122439	0.00441251
10	90588419	T	C	3604	10:90588419	-1.33855	0.470154	0.00441272
19	4454041	G	A	3604	19:4454041	5341.44	1877.01	0.00443126
2	146247003	T	C	3604	2:146247003	0.204691	0.0719632	0.00444967
17	7091650	T	C	3604	17:7091650	-0.170054	0.0598345	0.00448221
14	107212287	A	G	3604	14:107212287	0.173017	0.0608995	0.00449683
7	132263595	A	G	3604	7:132263595	0.167654	0.0590176	0.00450069
6	8639771	T	G	3604	6:8639771	-0.171618	0.0605444	0.00458852
10	127484721	A	C	3604	10:127484721	-0.363602	0.128386	0.00462439
5	76219181	T	C	3604	5:76219181	-0.243478	0.0860266	0.00465091
11	9606879	A	C	3604	11:9606879	-1.49718	0.529463	0.00468801
11	63057846	A	G	3604	11:63057846	-0.624458	0.220932	0.00470646
18	50994295	G	A	3604	18:50994295	1.71372	0.607148	0.00476396
15	51289556	A	G	3604	15:51289556	-1.45957	0.517729	0.0048146
11	3697594	C	T	3604	11:3697594	0.3989	0.141522	0.00482274
2	46023916	C	T	3604	2:46023916	-0.16756	0.0594752	0.00484286
3	125313635	C	A	3604	3:125313635	-2.17782	0.77354	0.00487181
5	154346263	C	G	3604	5:154346263	1.53504	0.545589	0.00489996
16	26054257	G	A	3604	16:26054257	-0.186779	0.066446	0.0049389
13	111082058	T	C	3604	13:111082058	0.174128	0.062032	0.00499952
17	649067	A	G	3604	17:649067	1.24503	0.443589	0.00500501
19	31039669	C	T	3604	19:31039669	2.67766	0.954581	0.00503074
1	85028969	C	A	3604	1:85028969	0.427117	0.152401	0.00506941
6	74497009	A	G	3604	6:74497009	0.16837	0.060146	0.00512058
3	49313978	C	T	3604	3:49313978	-0.365133	0.130437	0.00512147
4	111718067	G	A	3604	4:111718067	0.183282	0.0654814	0.00512616
6	33160425	T	G	3604	6:33160425	0.174954	0.062523	0.00513825
11	59029485	T	C	3604	11:59029485	-0.16546	0.0591641	0.00516386
1	17660499	C	G	3604	1:17660499	-0.168332	0.0602183	0.00518415
7	47925525	G	T	3604	7:47925525	0.298381	0.106746	0.00518605
18	46440489	C	T	3604	18:46440489	-0.196017	0.0701338	0.00519168
22	39826210	G	A	3604	22:39826210	-2.40985	0.862435	0.00520228
4	160630642	C	T	3604	4:160630642	-0.167428	0.0600605	0.00530911
3	48630293	G	A	3604	3:48630293	-1.90223	0.682796	0.00533729
19	47865889	C	A	3604	19:47865889	-1.24102	0.445576	0.00534939
19	9048170	G	A	3604	19:9048170	-0.598408	0.214921	0.00536417
5	134782450	A	T	3604	5:134782450	0.166863	0.0599407	0.00537248
12	40792300	G	A	3604	12:40792300	-0.486385	0.174804	0.0053948
2	225244888	A	G	3604	2:225244888	-0.186153	0.0669092	0.0053996
11	92708710	C	G	3604	11:92708710	-0.167499	0.0602053	0.00540022
20	39980462	C	T	3604	20:39980462	1.67374	0.602099	0.00543864
17	39998487	G	A	3604	17:39998487	1.16633	0.419741	0.0054579
6	36930773	T	G	3604	6:36930773	-1.57334	0.566264	0.00546182
18	9221883	C	G	3604	18:9221883	-0.468983	0.168849	0.00547739
18	9254785	C	T	3604	18:9254785	-0.468983	0.168849	0.00547739
18	9255784	C	A	3604	18:9255784	-0.468983	0.168849	0.00547739
18	9258537	T	C	3604	18:9258537	-0.468983	0.168849	0.00547739
6	30656509	G	A	3604	6:30656509	-0.640919	0.230838	0.00549499
8	26721748	C	T	3604	8:26721748	-0.71021	0.255825	0.00550067
9	22098574	A	G	3604	9:22098574	0.167884	0.0604763	0.00550269
5	134782576	G	T	3604	5:134782576	0.166442	0.0599751	0.00551702
15	29418520	C	T	3604	15:29418520	-0.167032	0.060239	0.00555736
12	109041188	T	C	3604	12:109041188	1.77355	0.639696	0.00556299
6	33690796	T	C	3604	6:33690796	0.220741	0.0796454	0.00557912
3	97328284	T	G	3604	3:97328284	0.164576	0.0594005	0.00559499
6	24437458	T	C	3604	6:24437458	-0.186934	0.0674803	0.00560216
7	68860360	A	G	3604	7:68860360	-0.182134	0.065768	0.0056169
4	10324160	G	A	3604	4:10324160	0.172421	0.0622862	0.00563653
2	200015428	T	G	3604	2:200015428	-0.181316	0.0655755	0.00569236
17	16347325	T	C	3604	17:16347325	1.82632	0.661136	0.00573781
6	161082461	T	C	3604	6:161082461	-0.165252	0.0598697	0.00577664
12	14587301	G	A	3604	12:14587301	-0.166956	0.0605438	0.00582266
6	127771400	A	G	3604	6:127771400	10775.3	3907.66	0.00582486
1	169823718	C	T	3604	1:169823718	0.169775	0.0615793	0.00583329
11	117864063	A	G	3604	11:117864063	-1.13008	0.410176	0.00586746
6	13612078	A	G	3604	6:13612078	-2.81992	1.02486	0.00593195
4	5023112	A	G	3604	4:5023112	0.502723	0.182791	0.00595477
11	31329373	C	T	3604	11:31329373	0.578176	0.210231	0.00595594
6	132206094	A	C	3604	6:132206094	0.415309	0.151055	0.00597051
11	116661392	C	A	3604	11:116661392	0.347058	0.126273	0.00598748
6	32205072	C	T	3604	6:32205072	-0.266071	0.0968409	0.0060051
1	205312566	G	A	3604	1:205312566	1.30696	0.475902	0.00602759
10	20674653	G	A	3604	10:20674653	0.161799	0.0589245	0.00603499
3	33195309	A	G	3604	3:33195309	-0.190485	0.0693812	0.00604222
6	29323276	C	T	3604	6:29323276	-0.487593	0.17767	0.00606267
2	124998364	G	T	3604	2:124998364	-0.194565	0.0709626	0.00611039
8	86351997	G	A	3604	8:86351997	-0.164611	0.0600485	0.00611972
19	54387497	C	T	3604	19:54387497	0.665104	0.242666	0.00612865
6	33192867	C	A	3604	6:33192867	0.171201	0.0624874	0.00614833
11	124189306	G	A	3604	11:124189306	-0.220297	0.0805026	0.00620925
19	31863085	A	G	3604	19:31863085	-0.165706	0.0606012	0.00625012
19	16687007	C	T	3604	19:16687007	1.0701	0.391557	0.00627723
7	103138354	G	A	3604	7:103138354	1.09883	0.402098	0.00628106
10	56287583	T	C	3604	10:56287583	-1.82673	0.668916	0.00631659
3	124385301	T	C	3604	3:124385301	-0.28788	0.105435	0.00632587
3	124390722	G	A	3604	3:124390722	-0.28788	0.105435	0.00632587
22	42950033	G	A	3604	22:42950033	-0.503457	0.184537	0.00636764
21	18008449	A	G	3604	21:18008449	-0.170617	0.0625834	0.00640616
6	29508273	T	C	3604	6:29508273	-0.480289	0.176366	0.00646441
4	3451109	G	A	3604	4:3451109	0.514823	0.189084	0.00647453
2	136418952	C	T	3604	2:136418952	-1.42394	0.523371	0.00651428
12	53164891	T	G	3604	12:53164891	1.45902	0.536424	0.00653007
17	7329632	T	G	3604	17:7329632	0.409375	0.150561	0.00654808
11	12237861	A	G	3604	11:12237861	0.708618	0.26076	0.00657746
17	77894206	G	A	3604	17:77894206	-0.164485	0.0605291	0.00657854
8	110463357	C	T	3604	8:110463357	3.00267	1.10565	0.00661245
2	110863908	A	G	3604	2:110863908	-0.161103	0.0593217	0.00661253
9	82359588	C	T	3604	9:82359588	0.168281	0.062043	0.00668106
1	113456546	T	A	3604	1:113456546	-0.171123	0.0630947	0.00668457
6	90577984	C	T	3604	6:90577984	-0.313944	0.11581	0.00671084
5	134782510	C	T	3604	5:134782510	0.162517	0.0599694	0.00672847
17	15341332	C	T	3604	17:15341332	-0.358003	0.132176	0.00675828
11	111817914	C	T	3604	11:111817914	-0.161997	0.0598197	0.0067674
22	19195680	T	C	3604	22:19195680	0.365454	0.135026	0.00679879
22	19197949	G	A	3604	22:19197949	0.365454	0.135026	0.00679879
20	6578556	T	C	3604	20:6578556	-0.174293	0.0644019	0.00680304
5	169685163	T	C	3604	5:169685163	0.162434	0.0600429	0.00682414
8	77258843	A	G	3604	8:77258843	0.313976	0.116112	0.00684937
16	11364079	A	T	3604	16:11364079	0.223863	0.0828074	0.00686311
17	66903998	C	T	3604	17:66903998	0.503439	0.186224	0.00686326
3	49294250	C	A	3604	3:49294250	-0.351644	0.130141	0.0068921
6	33048457	C	G	3604	6:33048457	0.217341	0.0804424	0.00689605
6	151673179	A	T	3604	6:151673179	-0.611708	0.226496	0.0069184
7	68905738	C	T	3604	7:68905738	-0.168575	0.0625179	0.00700891
7	110236649	A	G	3604	7:110236649	0.16595	0.0615503	0.00701413
1	214820634	C	T	3604	1:214820634	1.27788	0.474129	0.00703422
1	226626277	A	G	3604	1:226626277	-0.230111	0.085422	0.00706401
3	112642568	G	C	3604	3:112642568	-0.16797	0.0623565	0.0070661
4	155542248	C	T	3604	4:155542248	0.160071	0.0594464	0.00708778
8	13357340	G	C	3604	8:13357340	0.193545	0.0718882	0.00709593
5	118811533	A	G	3604	5:118811533	-0.164469	0.0611876	0.00718927
21	47738035	C	T	3604	21:47738035	0.404241	0.150438	0.00720754
19	55481398	G	A	3604	19:55481398	-0.363357	0.135255	0.00722129
10	104660004	A	G	3604	10:104660004	-0.176387	0.0657366	0.00729128
12	108894909	T	C	3604	12:108894909	-0.176142	0.0656467	0.00729272
17	50474108	T	C	3604	17:50474108	0.160692	0.0598979	0.00730147
11	122189465	G	A	3604	11:122189465	-0.180684	0.067356	0.00730693
14	96178688	C	T	3604	14:96178688	0.227072	0.084671	0.00732225
2	131127678	A	G	3604	2:131127678	-2.94923	1.09993	0.00733404
6	32184345	T	C	3604	6:32184345	0.173335	0.0646817	0.0073663
1	9833335	A	T	3604	1:9833335	-0.316193	0.118096	0.007419
17	45904420	C	T	3604	17:45904420	0.571268	0.213651	0.00749882
14	62932555	C	T	3604	14:62932555	-0.158436	0.0592835	0.00752855
1	75055741	A	C	3604	1:75055741	0.56725	0.212262	0.00753087
9	125391409	A	G	3604	9:125391409	-0.162518	0.0608141	0.00753177
22	34058890	G	A	3604	22:34058890	0.159334	0.059681	0.00759062
9	108936674	C	T	3604	9:108936674	0.185332	0.0694719	0.00763655
10	118228755	G	C	3604	10:118228755	0.685853	0.257183	0.00765807
11	124857708	G	A	3604	11:124857708	0.201363	0.0755111	0.00766068
1	201934578	G	A	3604	1:201934578	-0.369427	0.138553	0.00766843
10	20534333	G	A	3604	10:20534333	0.160148	0.0600772	0.00768266
1	157668390	T	C	3604	1:157668390	-0.15952	0.0598528	0.00769404
18	43246156	G	A	3604	18:43246156	-0.172764	0.0648521	0.0077225
16	88789709	C	T	3604	16:88789709	-2.40115	0.901566	0.00773766
6	30688427	G	T	3604	6:30688427	0.209919	0.0788451	0.00775808
22	19183787	A	G	3604	22:19183787	0.359334	0.134993	0.00777068
20	3846397	C	T	3604	20:3846397	-0.266905	0.100277	0.00777541
12	112354531	T	C	3604	12:112354531	0.173431	0.0651791	0.00779466
10	37074863	G	A	3604	10:37074863	-0.162425	0.0610554	0.00780721
17	32593665	G	A	3604	17:32593665	-0.160314	0.0602754	0.00782109
3	113586776	T	C	3604	3:113586776	-0.168376	0.0633287	0.00784286
1	152329369	C	G	3604	1:152329369	-0.19467	0.0732382	0.00785976
4	130092214	T	C	3604	4:130092214	-0.157616	0.0593027	0.0078648
3	49760039	C	T	3604	3:49760039	9911.8	3731.09	0.00789465
14	91763720	G	A	3604	14:91763720	1.34875	0.507961	0.00792546
4	159048596	T	C	3604	4:159048596	0.901014	0.339425	0.00794182
9	120053674	G	A	3604	9:120053674	-0.391226	0.147442	0.00796812
16	77320605	A	G	3604	16:77320605	-0.164773	0.0621127	0.00798243
12	1949940	G	A	3604	12:1949940	2.33843	0.881552	0.00798675
2	24563646	G	A	3604	2:24563646	0.167931	0.0633206	0.00800007
11	34916657	C	T	3604	11:34916657	1.16607	0.439744	0.00800881
3	57882601	C	T	3604	3:57882601	0.157856	0.0595382	0.00801723
18	27378023	A	G	3604	18:27378023	-0.174369	0.0657867	0.00803682
1	155451832	T	C	3604	1:155451832	0.996745	0.376352	0.00808637
9	35107455	T	C	3604	9:35107455	-2.74612	1.03728	0.0081106
11	78380625	C	T	3604	11:78380625	-1.33217	0.503343	0.00812943
3	38805069	T	C	3604	3:38805069	-0.225867	0.0853421	0.00813024
1	247601595	C	T	3604	1:247601595	-0.15911	0.0601198	0.00813175
6	29746869	T	C	3604	6:29746869	-0.265156	0.100193	0.00813395
14	65260321	C	T	3604	14:65260321	-0.728428	0.275305	0.00814742
15	24923283	G	A	3604	15:24923283	2.3516	0.889092	0.00817042
15	24923799	A	C	3604	15:24923799	2.3516	0.889092	0.00817042
11	20982082	C	G	3604	11:20982082	-1.48822	0.562725	0.00817699
11	94113466	G	T	3604	11:94113466	-0.308289	0.116579	0.00818171
3	104640080	A	G	3604	3:104640080	0.156084	0.0590263	0.00818581
3	38125659	C	T	3604	3:38125659	1.081	0.408999	0.00821649
3	38793940	A	G	3604	3:38793940	-0.196059	0.0742259	0.00825698
9	23487566	A	G	3604	9:23487566	-0.159473	0.0603819	0.00826445
8	15311877	A	G	3604	8:15311877	-0.168491	0.0637981	0.00826625
5	153057548	C	T	3604	5:153057548	0.405884	0.153763	0.00829863
5	54404085	G	A	3604	5:54404085	-0.6686	0.253318	0.00830607
1	36557619	G	A	3604	1:36557619	-0.17215	0.0652263	0.00830847
12	114646834	C	T	3604	12:114646834	0.176587	0.0669157	0.00831651
19	8326866	C	T	3604	19:8326866	-0.321608	0.121883	0.00832343
11	10745394	T	G	3604	11:10745394	-0.210686	0.0798522	0.00832864
15	69100577	A	G	3604	15:69100577	0.175891	0.0667051	0.008368
3	138678130	T	C	3604	3:138678130	0.19862	0.0754061	0.00843833
1	9780196	A	G	3604	1:9780196	-0.315075	0.119714	0.00849125
12	125179253	G	A	3604	12:125179253	-0.164041	0.0623375	0.00850095
4	156409087	G	A	3604	4:156409087	-0.157734	0.0599427	0.00850295
7	56344705	T	C	3604	7:56344705	-0.165188	0.0627923	0.0085207
17	73565171	T	C	3604	17:73565171	-0.219163	0.0833096	0.00852093
2	99005601	C	T	3604	2:99005601	-0.160251	0.060948	0.00855569
3	43618504	A	G	3604	3:43618504	-1.26146	0.47981	0.00856157
8	21964944	C	A	3604	8:21964944	1.21528	0.462293	0.00856854
13	79817124	C	T	3604	13:79817124	1.08007	0.411172	0.00861889
19	41932596	G	A	3604	19:41932596	-1.56114	0.594351	0.00862329
2	70387882	C	T	3604	2:70387882	0.884718	0.33708	0.00867362
5	115348119	A	G	3604	5:115348119	1.08777	0.414513	0.00868498
2	238336802	T	C	3604	2:238336802	-0.183874	0.0700863	0.00870212
5	112823998	T	C	3604	5:112823998	0.163416	0.0622953	0.00870979
14	55637473	G	C	3604	14:55637473	0.866798	0.330614	0.00874706
6	30057763	C	T	3604	6:30057763	-0.482251	0.183949	0.00875032
6	167753894	T	G	3604	6:167753894	1.91004	0.728578	0.00875194
4	155411939	A	C	3604	4:155411939	-0.225993	0.0862195	0.00876384
7	101923374	G	A	3604	7:101923374	1.41292	0.539052	0.00876428
6	161383479	T	C	3604	6:161383479	0.168255	0.0642265	0.00880035
19	58058561	C	G	3604	19:58058561	0.745023	0.284501	0.00882662
5	122682334	C	T	3604	5:122682334	-0.251333	0.0959793	0.0088286
12	69827658	T	G	3604	12:69827658	-0.16209	0.0619256	0.0088579
6	74521947	C	T	3604	6:74521947	-0.153956	0.0588209	0.0088609
9	135782221	T	C	3604	9:135782221	0.269808	0.103116	0.00888261
9	125391241	A	G	3604	9:125391241	-0.155804	0.0595683	0.00890837
2	167055164	T	C	3604	2:167055164	-0.929879	0.355702	0.00894339
11	68529121	G	A	3604	11:68529121	-2.84103	1.08681	0.00894624
10	104678841	G	A	3604	10:104678841	0.603549	0.230913	0.00895535
20	3128951	G	A	3604	20:3128951	0.879255	0.336456	0.0089677
4	155410650	T	C	3604	4:155410650	-0.232477	0.0889795	0.00898292
4	155410667	G	A	3604	4:155410667	-0.232477	0.0889795	0.00898292
1	203766964	A	G	3604	1:203766964	0.169094	0.0647504	0.00901523
1	110466466	C	T	3604	1:110466466	-0.159612	0.0611691	0.00907123
15	75044238	G	A	3604	15:75044238	-0.22967	0.088045	0.0090927
22	26631600	G	A	3604	22:26631600	-0.153582	0.0589589	0.00919014
17	11603111	A	G	3604	17:11603111	1.12807	0.433173	0.00920895
3	129140589	G	A	3604	3:129140589	0.595264	0.22868	0.00923994
8	15599587	G	A	3604	8:15599587	-0.16178	0.0621594	0.00925038
19	45395266	G	A	3604	19:45395266	-0.153428	0.058993	0.00930105
3	141807137	A	C	3604	3:141807137	0.168123	0.0646505	0.00930912
2	169764176	G	C	3604	2:169764176	0.155334	0.0597341	0.00931066
10	5772920	A	T	3604	10:5772920	-0.391163	0.150479	0.00933744
17	39871804	A	G	3604	17:39871804	-0.477462	0.183763	0.00937009
1	180062079	A	T	3604	1:180062079	-1.04438	0.4021	0.00939579
1	178426850	A	G	3604	1:178426850	0.953802	0.367395	0.00942832
6	132859609	A	T	3604	6:132859609	0.233032	0.0898034	0.00946138
3	49156473	C	G	3604	3:49156473	-0.335286	0.129258	0.00948874
19	56477697	C	A	3604	19:56477697	2.9168	1.12458	0.0094953
11	117864846	A	G	3604	11:117864846	-0.172431	0.0665216	0.00953898
1	116227961	A	G	3604	1:116227961	1.058	0.408693	0.00963272
19	58118371	G	A	3604	19:58118371	-0.595779	0.230291	0.00967961
5	1201806	G	A	3604	5:1201806	-0.435265	0.168253	0.00968241
2	198570253	G	A	3604	2:198570253	-1.73959	0.672446	0.00968269
6	28130359	A	G	3604	6:28130359	-0.512442	0.198171	0.00971388
17	32601183	G	A	3604	17:32601183	-0.15562	0.0601987	0.00973481
9	214864	C	T	3604	9:214864	-0.159678	0.0617686	0.00973522
1	161696663	G	A	3604	1:161696663	1.33695	0.517384	0.00976425
17	78848856	T	C	3604	17:78848856	-0.158854	0.061537	0.00983891
1	245804664	G	A	3604	1:245804664	-0.153749	0.0595618	0.00984201
1	152192978	C	T	3604	1:152192978	-2.03785	0.78959	0.00985427
7	13978809	T	C	3604	7:13978809	-0.158286	0.0613329	0.00985789
11	111724133	T	C	3604	11:111724133	-0.155376	0.0602417	0.00990256
20	19808654	A	G	3604	20:19808654	-0.187243	0.0726192	0.00992537
13	41134096	G	A	3604	13:41134096	0.391882	0.151997	0.00993112
16	58201628	T	C	3604	16:58201628	-0.296836	0.115154	0.0099452
13	26538455	C	T	3604	13:26538455	0.156091	0.060576	0.00997249
19	10818225	A	G	3604	19:10818225	-1.60139	0.622512	0.0100979
7	156469123	G	A	3604	7:156469123	-0.232507	0.0904174	0.0101264
15	41245289	T	C	3604	15:41245289	0.159575	0.0620609	0.0101327
6	29772549	C	G	3604	6:29772549	-0.226168	0.0879707	0.0101419
14	105420440	C	T	3604	14:105420440	0.601664	0.234058	0.0101529
3	20109901	G	T	3604	3:20109901	-0.152712	0.0594588	0.0102176
12	14653867	C	T	3604	12:14653867	-0.171109	0.0666228	0.010219
9	135147182	C	T	3604	9:135147182	-0.496898	0.193547	0.0102488
15	86278479	G	A	3604	15:86278479	-0.153816	0.0599466	0.0102912
2	103054449	G	A	3604	2:103054449	0.153667	0.0598962	0.010301
1	247695427	C	G	3604	1:247695427	0.897007	0.349692	0.0103135
1	222803204	A	G	3604	1:222803204	-0.156824	0.0611451	0.010324
12	79271359	G	A	3604	12:79271359	-0.150695	0.058765	0.0103367
7	38805215	C	T	3604	7:38805215	1.94231	0.75755	0.0103494
4	155412464	C	T	3604	4:155412464	-0.220881	0.0861826	0.0103789
6	32734304	A	G	3604	6:32734304	-0.543212	0.212087	0.0104292
15	31376365	G	A	3604	15:31376365	0.188182	0.0734925	0.0104504
17	49726596	G	C	3604	17:49726596	-1.53276	0.598643	0.0104553
1	3688073	G	A	3604	1:3688073	-1.03639	0.404905	0.0104798
8	97534651	C	T	3604	8:97534651	-0.18321	0.0716045	0.0105084
2	217984660	G	A	3604	2:217984660	-0.164124	0.0642195	0.0105985
20	34081351	A	T	3604	20:34081351	0.416971	0.163243	0.0106401
10	104719096	G	A	3604	10:104719096	-0.168199	0.0658592	0.0106517
6	32780724	G	A	3604	6:32780724	-0.174312	0.0683755	0.0107926
3	29853403	G	A	3604	3:29853403	0.257388	0.100985	0.01081
20	60899206	T	C	3604	20:60899206	-0.190131	0.0746037	0.0108174
20	61512185	G	C	3604	20:61512185	0.561795	0.220479	0.010832
11	44104981	T	C	3604	11:44104981	-0.152339	0.0597973	0.0108473
10	105204355	C	T	3604	10:105204355	-0.578871	0.227264	0.0108611
18	52752017	A	G	3604	18:52752017	0.152089	0.059731	0.0108895
16	78198138	G	T	3604	16:78198138	-0.983559	0.386356	0.0109049
2	241451351	G	A	3604	2:241451351	-0.196712	0.0773092	0.0109439
11	77937828	G	A	3604	11:77937828	-1.24486	0.489395	0.0109694
5	60936935	G	T	3604	5:60936935	0.16505	0.0648941	0.0109786
10	73975593	T	C	3604	10:73975593	0.300287	0.118087	0.0109925
18	57851097	T	C	3604	18:57851097	0.179616	0.0706575	0.0110199
6	32955976	A	G	3604	6:32955976	-0.186151	0.0732385	0.0110312
13	111368071	C	T	3604	13:111368071	1.4278	0.561759	0.0110327
12	50880216	T	C	3604	12:50880216	-0.1547	0.0608751	0.011045
9	18280143	G	A	3604	9:18280143	0.181534	0.0714852	0.0111025
1	12921252	C	T	3604	1:12921252	0.545074	0.214676	0.0111152
13	37393924	G	A	3604	13:37393924	0.715349	0.281779	0.0111268
16	89592774	T	C	3604	16:89592774	-1.48537	0.585242	0.0111476
6	29607747	G	A	3604	6:29607747	0.794442	0.313017	0.0111483
9	136029007	C	T	3604	9:136029007	-2.3986	0.946	0.0112281
17	3786907	G	A	3604	17:3786907	0.2128	0.0839317	0.0112321
19	1085665	G	A	3604	19:1085665	-1.77842	0.701553	0.0112456
9	22125347	C	A	3604	9:22125347	-0.153086	0.060421	0.0112877
18	57851763	A	G	3604	18:57851763	0.178963	0.0706562	0.0113131
4	113918577	C	T	3604	4:113918577	0.150546	0.0594619	0.0113478
5	131770805	C	T	3604	5:131770805	-1.00539	0.397258	0.0113794
2	27306780	G	A	3604	2:27306780	-0.751707	0.297053	0.0113883
10	50821243	A	G	3604	10:50821243	0.15471	0.061151	0.0114074
1	57805550	A	C	3604	1:57805550	1.9843	0.784434	0.0114193
3	37388702	C	T	3604	3:37388702	-1.00314	0.397043	0.0115195
14	73437732	T	C	3604	14:73437732	-1.22538	0.485109	0.0115376
5	149410319	T	A	3604	5:149410319	-0.691324	0.273725	0.0115496
1	85666156	T	G	3604	1:85666156	0.145546	0.0576663	0.0116051
17	71389826	C	T	3604	17:71389826	1.5602	0.618255	0.0116176
19	46158513	G	T	3604	19:46158513	0.14916	0.0591152	0.0116292
6	33079766	A	G	3604	6:33079766	-0.161691	0.0640919	0.0116423
9	125273435	G	A	3604	9:125273435	-0.160821	0.063776	0.0116806
11	123894317	G	T	3604	11:123894317	-0.191898	0.0761182	0.0117003
8	71239363	C	T	3604	8:71239363	-0.170806	0.0677563	0.0117058
5	129072868	C	T	3604	5:129072868	-2.10915	0.83668	0.011707
12	55715048	C	T	3604	12:55715048	2.04629	0.81176	0.0117084
2	68765205	C	T	3604	2:68765205	-0.656038	0.26041	0.0117605
3	179096187	A	T	3604	3:179096187	0.548497	0.217723	0.0117608
18	29300708	A	G	3604	18:29300708	-0.152342	0.0604979	0.0117975
13	32301038	G	T	3604	13:32301038	0.147134	0.058462	0.0118441
6	147435953	A	G	3604	6:147435953	0.254699	0.101292	0.0119201
1	150234692	T	C	3604	1:150234692	0.949015	0.377558	0.011952
1	156212578	C	T	3604	1:156212578	-1.57582	0.626945	0.0119541
7	96133531	C	T	3604	7:96133531	-0.220419	0.087723	0.0119823
7	40134678	A	G	3604	7:40134678	0.999231	0.397861	0.0120217
21	19438152	A	G	3604	21:19438152	-0.296992	0.11826	0.0120267
19	45162189	C	A	3604	19:45162189	-0.152047	0.060565	0.012057
15	53994493	G	A	3604	15:53994493	0.187214	0.0745739	0.0120579
6	30690938	C	T	3604	6:30690938	0.200668	0.0799347	0.0120596
12	42171982	C	T	3604	12:42171982	-0.164349	0.0655239	0.0121337
6	43623417	G	A	3604	6:43623417	-2.2478	0.896194	0.0121361
13	40229891	G	A	3604	13:40229891	0.149351	0.0595527	0.0121457
12	118311743	A	G	3604	12:118311743	0.212489	0.0847688	0.012187
10	20516587	T	C	3604	10:20516587	0.150148	0.0599173	0.0122131
10	5804509	C	T	3604	10:5804509	-0.436643	0.174283	0.0122327
4	113468564	C	T	3604	4:113468564	2.83175	1.1305	0.0122496
13	94408506	G	A	3604	13:94408506	-0.173351	0.0692141	0.0122601
19	45593478	C	T	3604	19:45593478	-3.87574	1.54748	0.0122606
19	8326944	G	A	3604	19:8326944	-0.306341	0.122316	0.0122625
3	111710398	A	G	3604	3:111710398	2.18036	0.87121	0.0123256
12	51457854	G	A	3604	12:51457854	2.76623	1.10547	0.0123383
2	17814030	T	C	3604	2:17814030	0.191525	0.0765835	0.0123889
6	32959770	A	T	3604	6:32959770	-0.183198	0.0732666	0.0124043
5	50057729	A	G	3604	5:50057729	-0.169138	0.0676545	0.0124185
6	71962755	T	C	3604	6:71962755	-0.208315	0.0833521	0.012447
6	33481204	A	G	3604	6:33481204	0.260709	0.104336	0.0124635
7	112407371	C	T	3604	7:112407371	-0.335483	0.134268	0.0124682
17	62041068	C	T	3604	17:62041068	1.53106	0.612891	0.012486
7	103207234	T	C	3604	7:103207234	0.148232	0.059339	0.0124875
1	224048645	T	C	3604	1:224048645	0.152476	0.0610626	0.0125234
12	63954300	C	T	3604	12:63954300	-0.883601	0.353901	0.0125337
20	7482971	C	T	3604	20:7482971	-0.153234	0.0613762	0.0125375
17	46939658	C	G	3604	17:46939658	-0.196414	0.0786852	0.0125532
12	69140381	C	T	3604	12:69140381	0.841249	0.33705	0.0125631
11	72004649	C	T	3604	11:72004649	-4.45781	1.78671	0.0125965
11	5528918	C	T	3604	11:5528918	0.327599	0.131307	0.0125989
22	32871383	T	G	3604	22:32871383	0.207705	0.0832616	0.0126098
16	23067260	G	T	3604	16:23067260	-0.177926	0.0713683	0.0126647
3	147108757	G	A	3604	3:147108757	0.527224	0.211582	0.0127092
15	41991315	T	A	3604	15:41991315	-0.210062	0.084417	0.0128325
8	12878982	T	C	3604	8:12878982	0.327045	0.131436	0.0128378
21	45217979	C	T	3604	21:45217979	-0.351124	0.141198	0.0128915
20	18395153	C	T	3604	20:18395153	1.27607	0.513219	0.0129043
12	55846623	T	C	3604	12:55846623	2.02654	0.815086	0.0129083
21	38117308	C	A	3604	21:38117308	0.328309	0.13205	0.0129101
10	47646751	T	C	3604	10:47646751	-0.16002	0.0643707	0.0129221
12	54448837	C	A	3604	12:54448837	1.46754	0.590464	0.0129407
13	40229957	T	A	3604	13:40229957	0.147988	0.0595502	0.0129519
9	124422403	G	A	3604	9:124422403	0.168629	0.0678958	0.0130044
6	33283594	G	A	3604	6:33283594	1.14646	0.461788	0.013041
15	41796779	C	T	3604	15:41796779	10032.9	4042.37	0.0130674
1	62574133	T	C	3604	1:62574133	1.26443	0.509462	0.013069
9	22125503	C	G	3604	9:22125503	-0.149881	0.0603951	0.0130766
7	120876835	A	G	3604	7:120876835	2.63154	1.06044	0.0130812
10	116361652	G	C	3604	10:116361652	-2.2439	0.904611	0.0131192
4	48038082	G	A	3604	4:48038082	2.79457	1.12753	0.0131938
3	129195600	G	A	3604	3:129195600	0.578302	0.233377	0.0132131
1	24519920	A	G	3604	1:24519920	-0.154966	0.0625562	0.0132409
6	90399646	A	G	3604	6:90399646	2.1108	0.852369	0.0132718
3	171360647	C	T	3604	3:171360647	-2.09478	0.84606	0.0132893
8	110380421	A	G	3604	8:110380421	0.147659	0.059646	0.0133019
4	156787340	A	G	3604	4:156787340	-0.340966	0.137789	0.0133402
6	90405706	G	A	3604	6:90405706	-0.812949	0.328539	0.0133447
10	96405329	C	T	3604	10:96405329	0.153169	0.0619179	0.0133705
17	46847364	C	A	3604	17:46847364	-0.202831	0.0819956	0.0133728
4	92063883	C	T	3604	4:92063883	-0.149203	0.0603359	0.0134029
15	74622549	G	T	3604	15:74622549	-0.26893	0.108778	0.0134251
17	79409643	G	A	3604	17:79409643	-3.18431	1.28837	0.0134516
18	47367762	G	C	3604	18:47367762	-2.66417	1.07794	0.0134537
6	38941501	C	T	3604	6:38941501	-3.44249	1.39287	0.0134543
1	242042301	G	A	3604	1:242042301	0.176482	0.0714085	0.013457
11	79065101	C	T	3604	11:79065101	-0.144395	0.058432	0.0134672
12	52966428	G	C	3604	12:52966428	-0.166887	0.067546	0.0134846
9	135277007	C	T	3604	9:135277007	0.490509	0.198537	0.0134881
19	49339098	T	C	3604	19:49339098	0.209175	0.0847026	0.0135293
20	25484623	G	A	3604	20:25484623	1.57776	0.639074	0.0135556
10	126097420	A	G	3604	10:126097420	1.2173	0.493114	0.0135642
19	34868776	T	C	3604	19:34868776	1.3932	0.564419	0.0135725
19	55526345	G	T	3604	19:55526345	0.569795	0.230864	0.0135833
12	64850050	G	A	3604	12:64850050	0.152731	0.0618918	0.013598
3	49200627	G	A	3604	3:49200627	-0.314568	0.127485	0.0136066
1	32157239	C	T	3604	1:32157239	0.710851	0.288093	0.0136086
18	19154143	G	A	3604	18:19154143	0.148815	0.0603216	0.0136241
6	32946133	T	C	3604	6:32946133	-0.180887	0.0733221	0.0136244
9	71820148	G	A	3604	9:71820148	-0.303302	0.12296	0.0136374
19	49206417	A	G	3604	19:49206417	0.610892	0.247817	0.0136979
13	42404710	C	T	3604	13:42404710	-2.29177	0.929847	0.0137136
9	125316157	C	T	3604	9:125316157	-0.156593	0.0635419	0.0137242
6	155577671	G	A	3604	6:155577671	-0.626577	0.25429	0.0137384
10	80955067	C	T	3604	10:80955067	0.150511	0.0610864	0.0137435
16	81211496	C	A	3604	16:81211496	-0.267017	0.108424	0.0137894
21	31692277	G	T	3604	21:31692277	-0.563644	0.228901	0.0138013
10	115412785	T	G	3604	10:115412785	-0.68076	0.276508	0.0138169
9	97522373	G	A	3604	9:97522373	-0.825508	0.335351	0.0138309
2	241679505	G	A	3604	2:241679505	1.19923	0.487219	0.0138404
6	100838246	G	A	3604	6:100838246	0.965202	0.392231	0.0138627
5	116752778	C	A	3604	5:116752778	0.151272	0.0614861	0.0138834
10	80942631	A	G	3604	10:80942631	-0.146455	0.0595295	0.0138856
6	33774394	C	A	3604	6:33774394	0.202128	0.0821832	0.0139138
18	47101838	G	A	3604	18:47101838	1.71179	0.69622	0.0139445
14	75329973	C	T	3604	14:75329973	0.472698	0.192291	0.0139617
7	113141308	A	G	3604	7:113141308	0.147584	0.0600372	0.0139629
4	126431919	T	C	3604	4:126431919	0.16632	0.0676879	0.014004
12	120621424	C	T	3604	12:120621424	-1.43879	0.58565	0.0140203
15	42360950	C	T	3604	15:42360950	2.79166	1.13666	0.0140484
6	32944746	G	A	3604	6:32944746	-0.18003	0.0733265	0.0140815
17	55058558	C	A	3604	17:55058558	-0.925456	0.376974	0.0140901
8	91054991	G	A	3604	8:91054991	1.00444	0.40918	0.0140974
2	198896895	A	G	3604	2:198896895	0.168607	0.0686945	0.0141104
2	3384825	A	G	3604	2:3384825	0.147333	0.0600284	0.0141122
10	123844503	C	T	3604	10:123844503	-0.232568	0.0947916	0.0141486
3	104570060	A	G	3604	3:104570060	-0.168295	0.0686017	0.0141582
12	117383245	C	T	3604	12:117383245	-1.72127	0.701898	0.0141941
2	84880445	G	C	3604	2:84880445	0.360776	0.147185	0.0142391
5	66495847	T	C	3604	5:66495847	-0.147277	0.0600861	0.0142424
17	1183354	C	T	3604	17:1183354	0.255605	0.104282	0.0142427
1	36636835	C	T	3604	1:36636835	0.481364	0.196416	0.0142564
19	45414451	T	C	3604	19:45414451	-0.150729	0.0615302	0.0142985
19	49214274	G	A	3604	19:49214274	0.612975	0.250292	0.0143237
6	29745726	G	A	3604	6:29745726	-0.211674	0.0864976	0.0143985
15	74467625	C	G	3604	15:74467625	0.791751	0.323847	0.014492
8	27315936	A	G	3604	8:27315936	0.311695	0.127509	0.0145059
14	52377739	C	T	3604	14:52377739	0.176366	0.0721701	0.0145353
17	59793364	G	A	3604	17:59793364	-1.30007	0.532036	0.0145428
15	90174824	C	T	3604	15:90174824	-0.153784	0.0629343	0.0145433
4	113565835	G	A	3604	4:113565835	-0.191632	0.0784482	0.0145745
8	110413762	T	C	3604	8:110413762	0.145801	0.0597164	0.0146243
12	17903344	A	G	3604	12:17903344	0.145259	0.0594984	0.014631
19	50940938	G	T	3604	19:50940938	1.62086	0.66407	0.014655
3	119379078	C	T	3604	3:119379078	-2.84997	1.16781	0.0146691
17	4337267	C	T	3604	17:4337267	0.661338	0.271108	0.014712
10	105966404	A	G	3604	10:105966404	0.14838	0.0608577	0.0147628
6	29364787	T	C	3604	6:29364787	2.10497	0.863399	0.0147688
3	78608819	A	G	3604	3:78608819	-0.262636	0.107769	0.0148083
2	240279945	A	G	3604	2:240279945	0.169335	0.0695061	0.0148401
17	80545106	G	A	3604	17:80545106	0.930217	0.381902	0.0148609
17	58786625	G	A	3604	17:58786625	0.279713	0.114902	0.0149182
21	19568520	T	C	3604	21:19568520	0.154853	0.0636114	0.0149183
19	50549016	C	G	3604	19:50549016	-1.01643	0.417673	0.0149516
3	129694681	C	G	3604	3:129694681	0.154142	0.0633621	0.0149863
7	110764837	C	A	3604	7:110764837	2.07392	0.852896	0.0150313
12	71663102	T	C	3604	12:71663102	0.177221	0.0729004	0.0150574
1	24432540	C	A	3604	1:24432540	-0.458554	0.188662	0.0150753
8	22675244	G	C	3604	8:22675244	-0.589307	0.242538	0.0151091
5	78477017	A	G	3604	5:78477017	-0.143147	0.0589162	0.0151126
11	111597714	A	C	3604	11:111597714	1.43077	0.588883	0.0151137
1	63049593	C	G	3604	1:63049593	-0.169221	0.0696486	0.0151141
5	70751781	A	G	3604	5:70751781	1.1659	0.480091	0.0151616
17	13980134	C	T	3604	17:13980134	-1.56422	0.644344	0.0151988
1	159890155	G	A	3604	1:159890155	-0.373781	0.153979	0.015204
19	38852357	T	G	3604	19:38852357	0.360744	0.148668	0.0152446
3	128316435	A	G	3604	3:128316435	0.150463	0.0620176	0.0152605
17	80863857	T	C	3604	17:80863857	-0.159126	0.0656206	0.015311
5	150946966	A	G	3604	5:150946966	-0.176473	0.0727855	0.0153271
20	18395988	C	T	3604	20:18395988	0.187297	0.0772511	0.0153286
4	83582064	G	T	3604	4:83582064	-0.144634	0.0596783	0.0153689
6	39507994	A	G	3604	6:39507994	1.16949	0.482595	0.015379
8	22426701	C	T	3604	8:22426701	-0.720438	0.297341	0.0153955
14	94756750	C	T	3604	14:94756750	-0.147674	0.0609676	0.0154277
21	18046232	G	A	3604	21:18046232	-0.17354	0.0716467	0.0154284
9	98229479	T	C	3604	9:98229479	0.717738	0.296452	0.0154739
17	20697797	C	A	3604	17:20697797	-0.149115	0.0616118	0.0155102
7	132169649	G	T	3604	7:132169649	-0.665469	0.275211	0.0156048
10	123842523	G	A	3604	10:123842523	-0.226761	0.0937793	0.015605
22	24743090	C	T	3604	22:24743090	-0.658085	0.272223	0.0156296
9	130884753	C	T	3604	9:130884753	-2.63852	1.09215	0.0156972
10	26355906	G	A	3604	10:26355906	0.165191	0.0683998	0.0157317
11	121291294	A	C	3604	11:121291294	0.146017	0.0604629	0.0157358
5	161179799	G	A	3604	5:161179799	0.149649	0.061977	0.0157532
2	220197321	C	T	3604	2:220197321	-0.185166	0.0766944	0.0157637
6	33072415	C	G	3604	6:33072415	-0.15663	0.0648765	0.0157666
19	49206985	G	A	3604	19:49206985	0.595107	0.246533	0.0157826
19	49208865	G	A	3604	19:49208865	0.595107	0.246533	0.0157826
16	73140753	A	G	3604	16:73140753	0.142649	0.0591402	0.0158631
6	31106793	T	C	3604	6:31106793	-1.66904	0.691984	0.0158669
20	61513649	G	T	3604	20:61513649	0.492815	0.20438	0.0158974
6	158517308	G	A	3604	6:158517308	0.145012	0.060141	0.0159002
12	17319646	C	A	3604	12:17319646	0.175646	0.0728493	0.015905
5	74400151	A	C	3604	5:74400151	0.291392	0.120858	0.0159076
5	74400400	T	C	3604	5:74400400	0.291392	0.120858	0.0159076
6	126210395	G	T	3604	6:126210395	-0.145461	0.0603326	0.0159092
15	82360108	A	G	3604	15:82360108	-0.143526	0.0595455	0.0159369
7	131894868	T	G	3604	7:131894868	-0.142889	0.0592879	0.0159489
22	20755631	G	A	3604	22:20755631	-2.16485	0.898268	0.0159513
4	113568544	G	A	3604	4:113568544	-0.188944	0.0784074	0.0159626
7	138872345	C	A	3604	7:138872345	0.147176	0.0610891	0.0159876
9	82392719	A	G	3604	9:82392719	0.148439	0.0616291	0.0160147
4	126357469	A	G	3604	4:126357469	0.143526	0.059621	0.0160705
18	35765411	G	T	3604	18:35765411	-0.147999	0.0615208	0.016143
2	179549988	G	A	3604	2:179549988	-0.78133	0.324804	0.0161483
11	10019879	G	A	3604	11:10019879	0.65627	0.272878	0.0161728
6	29759885	G	A	3604	6:29759885	-0.211337	0.0879489	0.0162633
19	3281586	G	A	3604	19:3281586	-0.182485	0.0759783	0.0163143
12	27940158	C	T	3604	12:27940158	-0.15622	0.065054	0.0163328
14	24653523	G	C	3604	14:24653523	0.144143	0.0600715	0.0164163
7	140231130	C	A	3604	7:140231130	1.92621	0.802795	0.0164232
1	220445634	C	T	3604	1:220445634	1.30856	0.545402	0.0164281
1	39800558	C	A	3604	1:39800558	1.8913	0.788421	0.0164467
5	22109314	A	G	3604	5:22109314	0.142987	0.0596547	0.0165337
2	103070568	T	C	3604	2:103070568	0.143632	0.0599376	0.0165587
11	828864	G	A	3604	11:828864	-3.0435	1.27073	0.0166168
22	41617247	C	T	3604	22:41617247	-0.991466	0.414007	0.0166291
2	220193917	C	T	3604	2:220193917	-0.223673	0.0934373	0.0166734
2	55407754	T	C	3604	2:55407754	-0.435689	0.182103	0.0167319
4	187629538	C	T	3604	4:187629538	-0.207163	0.0866116	0.016763
16	81534790	C	T	3604	16:81534790	0.145165	0.0607055	0.016789
16	15601620	T	C	3604	16:15601620	0.140783	0.0588879	0.0168166
19	10624838	C	T	3604	19:10624838	0.464869	0.194457	0.0168209
16	66413195	A	G	3604	16:66413195	0.139321	0.0582949	0.0168512
6	3264526	T	C	3604	6:3264526	0.144402	0.0604539	0.016911
12	6562823	C	T	3604	12:6562823	0.152718	0.0639402	0.0169196
2	202006096	G	A	3604	2:202006096	0.437541	0.183329	0.0170028
17	7011225	T	G	3604	17:7011225	-0.233905	0.0980084	0.0170061
19	15295134	A	G	3604	19:15295134	-0.142409	0.0596757	0.0170147
15	74229065	G	A	3604	15:74229065	-0.140127	0.0587302	0.017035
7	107430114	C	T	3604	7:107430114	-1.02551	0.429876	0.0170517
11	76371301	G	A	3604	11:76371301	-0.835588	0.350325	0.0170707
2	172921832	C	T	3604	2:172921832	-0.145529	0.0610527	0.0171414
10	5790729	C	T	3604	10:5790729	-0.360576	0.151307	0.0171684
1	247600301	C	A	3604	1:247600301	-0.142689	0.0598797	0.017176
14	94756794	C	T	3604	14:94756794	-0.150563	0.0631879	0.0171826
14	79416899	G	A	3604	14:79416899	-0.143991	0.0604627	0.0172431
6	33079166	C	T	3604	6:33079166	-0.152178	0.0639115	0.0172625
12	49221495	G	A	3604	12:49221495	0.824228	0.346195	0.0172741
12	14656768	G	C	3604	12:14656768	-0.144025	0.060504	0.0172932
19	4210356	A	G	3604	19:4210356	-0.15027	0.0631306	0.0172986
3	131751775	A	C	3604	3:131751775	0.213801	0.0898309	0.0173108
4	20039702	T	C	3604	4:20039702	-0.140315	0.0589666	0.0173331
5	92515301	C	A	3604	5:92515301	0.144367	0.0606779	0.0173483
1	19413261	A	T	3604	1:19413261	0.160197	0.067336	0.0173567
3	48732480	T	C	3604	3:48732480	-0.299514	0.125928	0.0173856
1	63025942	T	G	3604	1:63025942	-0.165539	0.0696322	0.0174382
6	37427378	G	A	3604	6:37427378	-2.66542	1.1213	0.0174501
17	28296327	G	T	3604	17:28296327	0.150575	0.0633736	0.0175019
19	7573177	A	G	3604	19:7573177	-1.04188	0.438512	0.0175041
19	17660300	G	A	3604	19:17660300	0.153272	0.0645167	0.0175162
9	125316350	T	C	3604	9:125316350	-0.148193	0.0623937	0.0175427
11	57798992	G	A	3604	11:57798992	0.427946	0.180276	0.0176041
7	4874645	C	T	3604	7:4874645	-1.26241	0.531892	0.0176231
20	23065893	C	G	3604	20:23065893	1.62385	0.684177	0.0176236
22	40652873	A	G	3604	22:40652873	0.155997	0.0657283	0.0176271
17	10355763	C	T	3604	17:10355763	-0.238955	0.1007	0.017647
2	85662921	G	C	3604	2:85662921	-0.769393	0.32426	0.0176555
12	50901882	C	T	3604	12:50901882	0.144935	0.0611032	0.0176933
12	3040354	G	A	3604	12:3040354	2.09192	0.882002	0.0177022
2	71827854	G	A	3604	2:71827854	-0.694371	0.292763	0.0177023
4	57860862	G	T	3604	4:57860862	0.612719	0.258454	0.0177541
7	103276733	T	G	3604	7:103276733	-1.95875	0.826254	0.0177577
19	17303774	G	T	3604	19:17303774	0.162103	0.0683939	0.0177814
11	121016276	C	T	3604	11:121016276	-2.66489	1.12439	0.0177846
19	6467619	G	T	3604	19:6467619	0.534285	0.22547	0.0178049
10	115410234	T	C	3604	10:115410234	0.151465	0.0639216	0.0178102
1	156351699	A	G	3604	1:156351699	0.156944	0.0662493	0.0178365
15	42363078	T	C	3604	15:42363078	2.7035	1.14125	0.017841
2	179611639	C	T	3604	2:179611639	1.78126	0.752503	0.0179277
3	42738594	C	T	3604	3:42738594	0.223345	0.0943543	0.0179287
19	4891239	G	A	3604	19:4891239	-1.31181	0.554419	0.0179768
17	28406018	C	T	3604	17:28406018	0.149958	0.0633837	0.0179873
17	42338136	C	A	3604	17:42338136	0.447976	0.189371	0.0180008
19	35613689	G	A	3604	19:35613689	0.43351	0.183263	0.0180054
4	170037572	G	A	3604	4:170037572	0.268069	0.11336	0.0180421
9	37990801	A	G	3604	9:37990801	0.146269	0.061855	0.0180439
21	17001054	T	C	3604	21:17001054	0.172466	0.072943	0.0180597
7	111644163	C	T	3604	7:111644163	-0.842343	0.356307	0.0180743
12	40258580	T	A	3604	12:40258580	1.48853	0.629918	0.0181248
8	6218289	T	C	3604	8:6218289	-0.138115	0.0584545	0.0181389
2	60608759	T	C	3604	2:60608759	-0.723626	0.306412	0.0181956
15	30018627	T	C	3604	15:30018627	0.232779	0.0985873	0.0182184
12	123424824	G	C	3604	12:123424824	-0.954767	0.404649	0.0182997
12	990912	C	A	3604	12:990912	-0.176733	0.0749676	0.0184008
11	63057925	G	A	3604	11:63057925	-0.146588	0.0621847	0.0184085
17	6941749	A	T	3604	17:6941749	-0.661693	0.28074	0.0184252
8	74893850	C	G	3604	8:74893850	0.213525	0.0906909	0.0185513
2	29287898	G	A	3604	2:29287898	-1.21359	0.515456	0.018553
2	158889593	G	A	3604	2:158889593	0.519134	0.220592	0.0186045
20	55093178	C	T	3604	20:55093178	1.32582	0.563426	0.0186156
6	31753526	G	A	3604	6:31753526	0.371907	0.158063	0.0186277
7	48349647	C	T	3604	7:48349647	-0.214756	0.0912762	0.018632
15	80164053	T	C	3604	15:80164053	0.14178	0.060287	0.0186853
21	31691792	G	T	3604	21:31691792	-0.572812	0.243704	0.0187509
21	31709703	C	T	3604	21:31709703	-0.572812	0.243704	0.0187509
9	10260263	T	C	3604	9:10260263	0.161865	0.0688688	0.0187559
3	44775962	G	A	3604	3:44775962	0.223021	0.094892	0.0187604
3	44777796	C	T	3604	3:44777796	0.223021	0.094892	0.0187604
16	30978334	G	A	3604	16:30978334	1.32312	0.56308	0.018784
7	92734051	C	T	3604	7:92734051	-0.453445	0.193002	0.0188021
19	39913558	A	G	3604	19:39913558	2.04573	0.870771	0.0188071
9	13007129	C	T	3604	9:13007129	0.209955	0.0893688	0.018808
16	1816536	C	A	3604	16:1816536	-3.36799	1.43363	0.0188099
8	110027347	C	T	3604	8:110027347	0.154669	0.0658558	0.018844
1	93142719	A	G	3604	1:93142719	0.9771	0.416048	0.0188478
6	30993533	A	G	3604	6:30993533	-0.1552	0.0660877	0.0188543
13	62248573	C	T	3604	13:62248573	-0.160921	0.0685355	0.0188749
11	34969112	A	G	3604	11:34969112	1.10832	0.472226	0.0189241
4	983625	C	T	3604	4:983625	-0.464201	0.197796	0.0189321
3	113165480	T	G	3604	3:113165480	-0.300314	0.127989	0.0189556
2	178985115	A	G	3604	2:178985115	0.686443	0.292667	0.0190027
2	112922697	G	A	3604	2:112922697	2.16424	0.92277	0.0190079
8	74893821	A	G	3604	8:74893821	0.212464	0.0905931	0.019014
6	27279877	T	C	3604	6:27279877	-0.500853	0.213562	0.0190151
21	15516948	C	T	3604	21:15516948	0.261832	0.111646	0.0190173
4	13584301	A	G	3604	4:13584301	0.756703	0.322757	0.0190527
22	35262039	G	A	3604	22:35262039	0.139483	0.0594998	0.0190646
15	78770665	A	G	3604	15:78770665	-1.35816	0.579393	0.0190725
17	36493203	C	T	3604	17:36493203	-0.203254	0.0867105	0.0190755
15	49627673	C	T	3604	15:49627673	-1.99841	0.852774	0.0191075
8	37730368	A	G	3604	8:37730368	-0.167938	0.071667	0.0191136
11	18267005	A	G	3604	11:18267005	0.147739	0.0630496	0.0191184
1	150679033	G	A	3604	1:150679033	-0.147644	0.0630546	0.0192053
7	99527243	T	C	3604	7:99527243	1.30098	0.555785	0.0192428
12	108954862	G	C	3604	12:108954862	-0.14666	0.0626825	0.0192982
1	174274224	G	A	3604	1:174274224	0.777236	0.33225	0.0193192
15	69238924	T	G	3604	15:69238924	0.92079	0.393649	0.0193297
19	40427903	A	C	3604	19:40427903	0.140322	0.0599897	0.0193304
2	166788282	C	A	3604	2:166788282	-2.75393	1.1774	0.0193354
2	241463595	T	C	3604	2:241463595	0.523012	0.223618	0.0193424
6	34498328	C	T	3604	6:34498328	0.569748	0.243764	0.0194239
6	150005515	G	T	3604	6:150005515	0.455479	0.194926	0.0194562
14	94756458	A	T	3604	14:94756458	-0.406808	0.174112	0.0194666
18	47800179	G	C	3604	18:47800179	0.182115	0.0779603	0.0194917
12	6619284	G	C	3604	12:6619284	0.149523	0.0640321	0.0195368
11	35227745	A	G	3604	11:35227745	2.62735	1.12573	0.0196004
10	104846178	T	C	3604	10:104846178	-0.152787	0.0654738	0.0196188
12	56230848	G	A	3604	12:56230848	-0.745052	0.319306	0.0196299
2	145871379	C	T	3604	2:145871379	0.149436	0.0640537	0.0196491
2	152420428	G	A	3604	2:152420428	-2.64907	1.13582	0.0196849
17	80417913	G	A	3604	17:80417913	-0.385602	0.165379	0.0197203
9	32492529	G	A	3604	9:32492529	-0.366808	0.15739	0.0197759
10	134008357	G	A	3604	10:134008357	0.870289	0.373458	0.0197875
11	111916647	A	G	3604	11:111916647	-0.139034	0.0596768	0.0198175
4	126426695	C	T	3604	4:126426695	0.145915	0.0626371	0.0198311
1	201355761	A	G	3604	1:201355761	0.449634	0.193052	0.0198548
1	212911836	C	T	3604	1:212911836	0.137072	0.0588678	0.019887
4	17805379	G	A	3604	4:17805379	0.220023	0.0945264	0.0199314
22	23278593	T	C	3604	22:23278593	0.146421	0.0629083	0.0199372
17	4458516	A	G	3604	17:4458516	-0.691699	0.297198	0.019944
7	2968245	C	T	3604	7:2968245	-0.987764	0.424468	0.0199618
11	33667333	G	A	3604	11:33667333	0.153229	0.0658548	0.0199776
18	65887287	C	T	3604	18:65887287	-0.137711	0.0591959	0.0199992
1	152329435	C	T	3604	1:152329435	0.138297	0.0594545	0.0200131
19	30165063	A	G	3604	19:30165063	0.702217	0.301923	0.0200284
6	33058718	G	A	3604	6:33058718	-0.150326	0.0646464	0.0200526
15	43020878	C	T	3604	15:43020878	-1.58908	0.683805	0.0201324
17	51901703	G	C	3604	17:51901703	-0.170048	0.0731911	0.0201608
5	139251346	C	T	3604	5:139251346	-0.586306	0.252357	0.0201618
11	63525778	C	T	3604	11:63525778	-2.56658	1.10481	0.0201736
11	126859157	A	C	3604	11:126859157	1.10021	0.473644	0.0201862
13	21557450	T	C	3604	13:21557450	0.805643	0.346839	0.0201892
19	57176482	C	T	3604	19:57176482	-0.137389	0.0591512	0.0201968
7	98995610	T	C	3604	7:98995610	-4.09747	1.76484	0.0202477
12	120189888	C	T	3604	12:120189888	-0.139209	0.0599763	0.0202829
5	131676320	C	T	3604	5:131676320	-0.935862	0.403309	0.0203161
11	13934928	A	G	3604	11:13934928	-0.148733	0.0641066	0.0203363
19	40902890	C	T	3604	19:40902890	-1.86493	0.803853	0.0203415
16	58292303	G	A	3604	16:58292303	-0.275174	0.118613	0.0203449
3	112666718	C	T	3604	3:112666718	0.431049	0.185836	0.0203675
3	119120980	C	A	3604	3:119120980	-1.22433	0.527851	0.0203703
7	47921682	A	T	3604	7:47921682	-0.169008	0.0728813	0.0203983
6	39539207	C	T	3604	6:39539207	0.252648	0.108976	0.0204291
12	30113883	C	G	3604	12:30113883	0.199802	0.0861882	0.0204382
19	17395003	A	G	3604	19:17395003	0.147878	0.063791	0.0204405
13	80095030	C	T	3604	13:80095030	1.53289	0.661297	0.0204489
1	179414105	A	C	3604	1:179414105	-0.329725	0.142262	0.0204635
20	5294679	A	G	3604	20:5294679	-2.48499	1.07223	0.0204712
9	139946061	A	G	3604	9:139946061	0.369919	0.159618	0.0204752
12	27234914	G	A	3604	12:27234914	-0.242216	0.104521	0.0204819
2	238443226	A	G	3604	2:238443226	-0.152148	0.0656588	0.0204898
1	152081108	G	A	3604	1:152081108	0.215171	0.092893	0.0205402
2	145739556	A	G	3604	2:145739556	0.351372	0.151706	0.0205504
7	142562292	C	T	3604	7:142562292	-2.94134	1.27011	0.0205682
8	144621035	G	A	3604	8:144621035	0.201787	0.0871789	0.0206332
14	69521637	C	T	3604	14:69521637	-1.9064	0.823665	0.0206389
8	110460488	G	T	3604	8:110460488	0.13787	0.0595782	0.0206617
2	215235867	C	A	3604	2:215235867	0.142416	0.0615477	0.0206723
15	42363480	G	A	3604	15:42363480	2.0525	0.887122	0.0206861
6	33095516	G	A	3604	6:33095516	0.139811	0.0604323	0.0206945
6	33117818	C	T	3604	6:33117818	-0.141076	0.0609896	0.0207162
8	23049292	T	C	3604	8:23049292	-0.388069	0.1678	0.0207397
1	210411339	G	A	3604	1:210411339	2.78301	1.20345	0.0207492
16	2030127	G	A	3604	16:2030127	-0.356743	0.154348	0.0208165
11	4661285	A	G	3604	11:4661285	0.847305	0.366648	0.0208357
16	321200	C	T	3604	16:321200	0.506791	0.219303	0.0208376
2	160761136	A	G	3604	2:160761136	-0.167799	0.07262	0.0208523
9	102723692	T	C	3604	9:102723692	0.143945	0.0623094	0.020879
14	77843814	T	C	3604	14:77843814	-0.290509	0.125799	0.020926
20	826140	C	A	3604	20:826140	-0.552068	0.239081	0.0209364
3	49700471	G	T	3604	3:49700471	-2.45615	1.06379	0.0209506
10	115389366	G	A	3604	10:115389366	-0.148194	0.0642207	0.021023
3	70397985	C	A	3604	3:70397985	0.146751	0.0636026	0.0210373
2	99227330	G	A	3604	2:99227330	-1.14718	0.497203	0.0210396
3	111923150	T	C	3604	3:111923150	-0.946062	0.410064	0.0210488
7	121652486	A	C	3604	7:121652486	-0.981596	0.42549	0.0210559
19	35837096	C	T	3604	19:35837096	2.01984	0.875534	0.0210559
10	98742750	A	C	3604	10:98742750	-0.177299	0.0768861	0.0211112
1	12198362	C	A	3604	1:12198362	-0.505297	0.219154	0.021129
2	233839369	T	C	3604	2:233839369	1.30219	0.564819	0.0211384
8	18258103	G	A	3604	8:18258103	0.161956	0.0702648	0.0211704
20	40007970	T	C	3604	20:40007970	-0.144131	0.0625433	0.0211943
2	16726739	T	C	3604	2:16726739	0.137537	0.0596888	0.0212092
17	2600186	G	A	3604	17:2600186	0.139692	0.0606331	0.0212285
7	6656897	G	A	3604	7:6656897	-0.15806	0.0686063	0.0212299
16	67037054	A	C	3604	16:67037054	-0.16074	0.0697774	0.0212446
1	236141174	C	T	3604	1:236141174	0.138151	0.0599736	0.021249
2	18736630	C	T	3604	2:18736630	-0.418777	0.181851	0.021287
9	5164260	T	C	3604	9:5164260	0.991746	0.430711	0.0213024
1	39827080	C	T	3604	1:39827080	-1.06361	0.462021	0.021331
15	84580582	C	A	3604	15:84580582	0.161501	0.0701576	0.0213368
15	84582124	T	G	3604	15:84582124	0.16149	0.0701577	0.021346
17	29161516	C	T	3604	17:29161516	-2.55376	1.10946	0.0213465
7	141673074	T	C	3604	7:141673074	0.399182	0.173428	0.0213508
11	124908352	T	C	3604	11:124908352	0.174458	0.0758126	0.0213815
9	125315557	C	T	3604	9:125315557	-0.142049	0.061734	0.0213921
19	34263930	A	G	3604	19:34263930	-0.452964	0.196872	0.0214025
8	142367014	C	T	3604	8:142367014	-0.371392	0.161467	0.0214419
5	134372685	T	C	3604	5:134372685	-0.139799	0.0607813	0.0214459
7	46919134	G	A	3604	7:46919134	0.139407	0.0606583	0.0215482
6	33172479	G	T	3604	6:33172479	0.464773	0.202329	0.0216126
2	102971865	G	T	3604	2:102971865	0.136757	0.0595386	0.0216215
8	57194163	T	C	3604	8:57194163	0.33706	0.14676	0.0216374
6	37487044	T	C	3604	6:37487044	0.142215	0.0619227	0.0216387
3	13659897	A	C	3604	3:13659897	0.174622	0.0760464	0.021661
15	100594247	G	A	3604	15:100594247	-1.70456	0.742364	0.0216688
9	100556109	G	A	3604	9:100556109	0.242671	0.105722	0.0217126
2	234368410	C	T	3604	2:234368410	-1.91356	0.833738	0.0217243
10	88703732	C	T	3604	10:88703732	0.346952	0.15119	0.0217436
6	30585771	C	G	3604	6:30585771	-0.452732	0.197346	0.0217847
11	111896324	T	C	3604	11:111896324	-0.1369	0.059689	0.0218166
6	138583859	A	C	3604	6:138583859	-0.553347	0.241305	0.0218398
3	141845000	T	G	3604	3:141845000	0.146264	0.0637897	0.021853
1	151288698	A	C	3604	1:151288698	-0.329596	0.143815	0.0219167
21	32410582	C	T	3604	21:32410582	-0.249878	0.109037	0.0219238
1	26189349	G	T	3604	1:26189349	0.605076	0.264046	0.0219315
17	57335131	G	A	3604	17:57335131	0.717801	0.313244	0.0219342
6	82467107	C	T	3604	6:82467107	0.13622	0.0594501	0.0219442
10	113935379	C	T	3604	10:113935379	-0.13607	0.0593858	0.0219472
17	41879074	T	C	3604	17:41879074	-0.606675	0.264785	0.0219519
11	123900916	C	T	3604	11:123900916	-0.172694	0.0753751	0.021956
22	20260814	T	G	3604	22:20260814	0.310881	0.135693	0.0219599
8	123165047	C	T	3604	8:123165047	-0.243218	0.106163	0.0219636
4	1985717	G	A	3604	4:1985717	0.767173	0.335004	0.0220189
11	44958869	C	T	3604	11:44958869	-0.597597	0.260979	0.0220314
20	22050503	G	A	3604	20:22050503	-0.147632	0.0644855	0.0220576
11	116611733	G	C	3604	11:116611733	0.165404	0.0722511	0.0220622
4	2943361	T	C	3604	4:2943361	-0.175259	0.0765714	0.0220891
16	69458591	C	T	3604	16:69458591	-0.310336	0.135591	0.0220929
6	33074908	A	G	3604	6:33074908	-0.139694	0.0610399	0.0221045
14	21546354	C	T	3604	14:21546354	0.251824	0.110048	0.0221191
4	156380807	T	G	3604	4:156380807	-0.136962	0.0598661	0.0221484
3	49085923	C	A	3604	3:49085923	-0.280269	0.122535	0.0221805
16	49671177	T	C	3604	16:49671177	-0.604336	0.264253	0.0221981
6	31322367	T	G	3604	6:31322367	0.23977	0.1049	0.0222718
16	71319715	C	T	3604	16:71319715	0.803433	0.351614	0.0223138
5	140529841	G	A	3604	5:140529841	1.09216	0.478093	0.0223472
15	89401109	A	G	3604	15:89401109	0.135741	0.0594332	0.0223757
1	63118196	A	C	3604	1:63118196	-0.172291	0.0754671	0.022431
1	51470242	G	A	3604	1:51470242	-0.215471	0.0943948	0.0224505
16	1129872	T	C	3604	16:1129872	0.163241	0.0715316	0.0224849
8	24003241	A	G	3604	8:24003241	-0.242233	0.10615	0.0224905
22	20103915	C	T	3604	22:20103915	0.792831	0.347496	0.0225155
9	107560803	C	T	3604	9:107560803	-1.30975	0.574082	0.0225208
6	33083121	T	C	3604	6:33083121	0.142387	0.062412	0.0225242
15	91416550	C	A	3604	15:91416550	0.184959	0.0810763	0.0225306
11	116660686	A	G	3604	11:116660686	0.164895	0.0723139	0.022592
12	40713901	T	A	3604	12:40713901	0.150146	0.0658542	0.0226094
1	55474231	G	A	3604	1:55474231	0.853404	0.374336	0.0226208
4	169432673	C	T	3604	4:169432673	-0.175255	0.0769057	0.0226772
4	10099340	C	T	3604	4:10099340	0.137978	0.0605663	0.0227187
10	104906211	T	C	3604	10:104906211	-0.149773	0.0657452	0.0227217
7	92764270	G	T	3604	7:92764270	-0.831672	0.365309	0.0228086
4	38933869	C	T	3604	4:38933869	1.96605	0.863673	0.022823
9	35563361	G	A	3604	9:35563361	0.985108	0.432827	0.0228468
7	48318613	A	G	3604	7:48318613	-0.536616	0.235793	0.0228582
20	50559652	C	T	3604	20:50559652	-0.135979	0.0597545	0.0228682
20	2847377	C	T	3604	20:2847377	-0.225353	0.0990585	0.0229093
6	166015431	T	C	3604	6:166015431	-0.144309	0.063437	0.0229158
2	172926226	G	T	3604	2:172926226	0.135969	0.0597843	0.0229466
10	115393929	G	A	3604	10:115393929	0.137675	0.0605605	0.0230054
3	45837886	G	C	3604	3:45837886	-0.307376	0.135238	0.0230348
6	33099210	G	A	3604	6:33099210	0.165198	0.0726843	0.0230378
2	101624384	T	C	3604	2:101624384	-0.236345	0.103999	0.0230524
6	36708556	C	G	3604	6:36708556	-0.15285	0.0672738	0.0230832
19	10079093	C	T	3604	19:10079093	0.149606	0.0658751	0.0231439
4	101386643	C	T	3604	4:101386643	-2.87774	1.26723	0.0231531
6	32605284	G	A	3604	6:32605284	-0.265431	0.116916	0.023191
5	74442920	A	G	3604	5:74442920	0.132516	0.0584028	0.0232686
9	120863442	A	G	3604	9:120863442	0.139846	0.0616357	0.0232741
5	74443132	C	T	3604	5:74443132	0.132495	0.0584037	0.0232929
2	44547609	G	A	3604	2:44547609	-2.37096	1.04539	0.0233284
11	47861581	T	C	3604	11:47861581	-2.40167	1.05943	0.0233933
7	55233024	G	A	3604	7:55233024	-3.40811	1.5036	0.0234128
4	155511897	T	C	3604	4:155511897	-0.1338	0.0590349	0.0234237
18	57839769	C	A	3604	18:57839769	0.160416	0.0707892	0.0234449
13	82986268	G	A	3604	13:82986268	0.134041	0.0591732	0.0234987
3	195997345	C	G	3604	3:195997345	0.901728	0.398074	0.0234988
6	35748931	T	C	3604	6:35748931	0.145052	0.0640463	0.0235254
10	104573017	G	T	3604	10:104573017	0.196139	0.0866083	0.023533
1	169776993	A	G	3604	1:169776993	-0.493733	0.218144	0.023615
17	74287389	C	T	3604	17:74287389	0.134271	0.0593361	0.023643
1	42630367	A	G	3604	1:42630367	0.625723	0.276557	0.0236638
8	144408508	C	T	3604	8:144408508	1.12417	0.497102	0.023732
3	186395572	T	A	3604	3:186395572	-0.161781	0.0715731	0.0237989
11	72533536	C	T	3604	11:72533536	-0.228795	0.101233	0.0238158
6	56351972	G	C	3604	6:56351972	0.186214	0.0823963	0.0238225
17	1840677	C	T	3604	17:1840677	-2.07245	0.917605	0.023912
16	1252369	T	C	3604	16:1252369	0.172911	0.0765802	0.0239511
5	140625340	G	A	3604	5:140625340	-1.8692	0.827929	0.0239656
15	55958417	T	C	3604	15:55958417	-0.135607	0.0600701	0.0239781
19	55536595	A	G	3604	19:55536595	0.530615	0.235051	0.0239803
6	7231022	A	G	3604	6:7231022	1.11193	0.492579	0.0239856
6	33057659	G	A	3604	6:33057659	-0.137734	0.0610219	0.0240001
10	109033022	G	A	3604	10:109033022	-0.133112	0.0589919	0.0240432
1	228363073	C	G	3604	1:228363073	-1.24057	0.549952	0.0240841
12	2061956	G	A	3604	12:2061956	0.609275	0.2701	0.024087
4	102751076	G	A	3604	4:102751076	-0.201985	0.0895505	0.0240992
1	94564543	G	A	3604	1:94564543	1.21281	0.53784	0.0241359
4	147246721	A	G	3604	4:147246721	-0.138004	0.0612037	0.0241438
2	50744774	C	T	3604	2:50744774	0.254769	0.112989	0.0241456
7	92085763	C	T	3604	7:92085763	2.64087	1.17132	0.0241579
14	103377321	G	A	3604	14:103377321	0.135986	0.0603169	0.0241631
3	157081324	A	G	3604	3:157081324	0.134486	0.0596519	0.0241637
9	990076	G	A	3604	9:990076	-0.203391	0.0902168	0.0241669
12	3046882	A	G	3604	12:3046882	-1.70903	0.758109	0.0241752
17	76798435	G	A	3604	17:76798435	-0.428145	0.190014	0.0242449
1	152331240	G	A	3604	1:152331240	0.133653	0.0593178	0.0242491
1	180506038	G	A	3604	1:180506038	-0.135997	0.0603598	0.0242522
1	167814812	T	C	3604	1:167814812	-0.949364	0.421408	0.0242695
10	101165607	T	C	3604	10:101165607	1.68005	0.74578	0.0242754
1	32164206	T	G	3604	1:32164206	0.144072	0.0639627	0.024295
15	49952940	A	G	3604	15:49952940	0.17186	0.076311	0.0243156
15	84573041	G	T	3604	15:84573041	0.158467	0.0703777	0.0243433
12	31820650	A	G	3604	12:31820650	-0.784419	0.348381	0.0243469
14	87384188	A	G	3604	14:87384188	0.138491	0.0615197	0.0243748
10	135346202	A	G	3604	10:135346202	-1.6322	0.725388	0.0244425
12	49498284	T	G	3604	12:49498284	-1.47476	0.655558	0.0244727
8	124828616	G	A	3604	8:124828616	0.142488	0.0633387	0.0244731
1	152316590	A	G	3604	1:152316590	0.133619	0.0593993	0.0244809
13	30458737	T	G	3604	13:30458737	0.23748	0.105588	0.0245043
19	2805172	G	A	3604	19:2805172	1.28249	0.570307	0.0245273
1	39797491	G	A	3604	1:39797491	-0.540934	0.240622	0.024572
20	61470065	G	A	3604	20:61470065	1.5949	0.709491	0.0245796
8	145135175	G	A	3604	8:145135175	1.10657	0.492281	0.024586
6	26392488	C	T	3604	6:26392488	1.85502	0.825332	0.0246011
10	50341918	C	T	3604	10:50341918	0.468133	0.208295	0.0246109
5	114607064	C	T	3604	5:114607064	2.41063	1.07267	0.0246194
16	1547104	G	C	3604	16:1547104	-0.755251	0.336083	0.0246263
20	33874600	C	T	3604	20:33874600	1.43374	0.638045	0.0246352
17	27536988	G	A	3604	17:27536988	-0.133421	0.0593767	0.0246387
16	88298124	T	C	3604	16:88298124	-0.162032	0.072115	0.0246496
14	60212544	C	A	3604	14:60212544	-0.827066	0.368107	0.0246522
8	89917982	C	T	3604	8:89917982	0.13387	0.0595993	0.0246928
11	14990543	G	T	3604	11:14990543	-0.490268	0.21832	0.0247274
6	26459961	T	C	3604	6:26459961	-2.44156	1.08729	0.0247333
20	44483837	C	T	3604	20:44483837	-2.73626	1.21853	0.0247335
3	110153012	T	G	3604	3:110153012	0.286563	0.127669	0.0247958
14	93151490	G	A	3604	14:93151490	2.61224	1.16413	0.0248368
17	3119840	C	T	3604	17:3119840	-2.36932	1.05611	0.0248681
4	41015611	G	A	3604	4:41015611	-3.25082	1.44909	0.024874
10	134752216	T	C	3604	10:134752216	-0.832149	0.371025	0.0249074
3	99266337	C	T	3604	3:99266337	-0.175756	0.0783674	0.0249147
18	20190795	A	G	3604	18:20190795	-0.394291	0.17588	0.0249732
20	15599531	G	A	3604	20:15599531	0.388689	0.173464	0.0250426
16	81157324	A	G	3604	16:81157324	-0.239225	0.106767	0.0250506
7	9770307	A	G	3604	7:9770307	0.13494	0.0602279	0.0250595
3	46724654	C	T	3604	3:46724654	-0.742146	0.331313	0.0250898
2	143743012	G	T	3604	2:143743012	-0.147782	0.0659857	0.0251165
14	60193907	G	A	3604	14:60193907	-0.824631	0.368352	0.0251752
12	88380094	T	C	3604	12:88380094	-0.37066	0.16557	0.0251765
11	16847973	C	T	3604	11:16847973	-1.0713	0.478739	0.0252374
8	145094849	G	A	3604	8:145094849	1.96213	0.876986	0.0252629
6	29800142	C	T	3604	6:29800142	-0.426719	0.190731	0.0252683
10	102056790	G	A	3604	10:102056790	2.80003	1.25159	0.0252752
19	55713535	G	A	3604	19:55713535	-0.134218	0.0599977	0.0252833
2	37469792	C	G	3604	2:37469792	-0.856678	0.382989	0.025298
6	112041045	C	T	3604	6:112041045	-1.57825	0.705666	0.0253161
12	118533478	C	T	3604	12:118533478	2.06113	0.921807	0.0253538
2	37439091	C	T	3604	2:37439091	0.919162	0.411156	0.0253811
2	241496770	C	A	3604	2:241496770	0.492473	0.220373	0.0254354
1	217308047	T	C	3604	1:217308047	0.136814	0.0612569	0.0255201
1	41306571	C	T	3604	1:41306571	0.154669	0.0692546	0.0255265
10	34817988	G	A	3604	10:34817988	2.59599	1.16252	0.0255438
3	186530484	C	T	3604	3:186530484	-0.132513	0.0593447	0.0255534
2	1756908	T	C	3604	2:1756908	-0.139495	0.0624731	0.0255565
10	123846288	G	A	3604	10:123846288	-0.20931	0.0937432	0.0255621
7	21639649	A	G	3604	7:21639649	-1.00985	0.452408	0.0256045
19	8609201	T	C	3604	19:8609201	-0.910892	0.408089	0.0256088
19	56473560	G	A	3604	19:56473560	2.12543	0.952339	0.0256279
3	175647165	G	A	3604	3:175647165	-0.445539	0.199636	0.0256309
9	135277472	G	A	3604	9:135277472	-0.885681	0.396972	0.0256752
21	43809148	A	G	3604	21:43809148	-0.684428	0.306777	0.0256793
12	16937829	C	T	3604	12:16937829	0.130929	0.0587133	0.0257495
4	165878335	G	A	3604	4:165878335	0.134663	0.0603922	0.0257605
18	61597386	C	G	3604	18:61597386	-1.28745	0.577447	0.0257765
4	141489068	C	T	3604	4:141489068	0.23836	0.106911	0.0257793
8	105360931	G	A	3604	8:105360931	0.711744	0.319271	0.0257954
8	13660787	C	A	3604	8:13660787	-0.131774	0.059111	0.0257966
15	69238660	C	A	3604	15:69238660	0.413716	0.185612	0.0258188
7	18629980	A	G	3604	7:18629980	1.95906	0.879042	0.0258385
1	232385051	G	A	3604	1:232385051	-0.150981	0.0677581	0.0258646
2	183703336	G	A	3604	2:183703336	1.29741	0.582267	0.0258669
3	17208267	T	C	3604	3:17208267	0.253534	0.113792	0.0258767
14	46919042	T	C	3604	14:46919042	-0.139359	0.0625528	0.0258894
17	9631303	G	A	3604	17:9631303	-2.03006	0.911311	0.0259057
17	39921271	G	A	3604	17:39921271	1.55984	0.700276	0.0259164
11	113629371	G	A	3604	11:113629371	-0.992421	0.445551	0.0259205
14	24806902	G	A	3604	14:24806902	1.75578	0.788329	0.0259331
12	6359894	A	C	3604	12:6359894	-0.370377	0.166317	0.0259514
1	63346976	A	G	3604	1:63346976	-0.13599	0.0610862	0.0260005
4	108115222	G	A	3604	4:108115222	-0.141904	0.0637484	0.026014
2	32961858	A	G	3604	2:32961858	0.204205	0.0917419	0.0260236
16	48544028	A	C	3604	16:48544028	0.176505	0.0793062	0.0260402
1	90179843	A	G	3604	1:90179843	-0.469031	0.210746	0.0260426
20	10281370	G	A	3604	20:10281370	0.133654	0.0600546	0.0260449
18	29848028	T	C	3604	18:29848028	-0.284816	0.128071	0.0261555
5	134364518	C	G	3604	5:134364518	-0.135065	0.0607474	0.0261898
2	225670901	G	C	3604	2:225670901	0.43558	0.195927	0.0262035
9	12367988	C	T	3604	9:12367988	0.133809	0.060205	0.0262458
5	123984763	T	C	3604	5:123984763	0.15021	0.0676049	0.0262914
12	27234999	T	C	3604	12:27234999	0.382729	0.172266	0.0263016
15	91310239	G	A	3604	15:91310239	-1.9439	0.875039	0.0263168
8	59407065	C	T	3604	8:59407065	-0.39496	0.177823	0.0263454
8	41906095	A	G	3604	8:41906095	0.161865	0.0728784	0.0263491
8	57179020	C	T	3604	8:57179020	0.321171	0.144614	0.0263583
18	33718326	A	C	3604	18:33718326	0.171842	0.077376	0.0263598
17	74287204	G	C	3604	17:74287204	0.131684	0.0593119	0.0264055
7	141429371	T	G	3604	7:141429371	0.384381	0.173134	0.02641
16	47545661	A	G	3604	16:47545661	-0.695446	0.31329	0.0264312
8	124831834	T	C	3604	8:124831834	0.140498	0.0632945	0.0264359
4	173930407	G	C	3604	4:173930407	1.06518	0.479936	0.0264579
2	241558547	A	G	3604	2:241558547	0.135732	0.061192	0.0265463
19	38817232	G	A	3604	19:38817232	0.906104	0.40851	0.0265501
6	29764472	C	T	3604	6:29764472	-0.232048	0.104628	0.0265652
14	77751332	T	C	3604	14:77751332	0.681812	0.307485	0.0265968
1	167865871	G	A	3604	1:167865871	2.63086	1.18674	0.0266316
19	3207646	A	G	3604	19:3207646	-0.133878	0.0604032	0.026664
9	78906150	A	G	3604	9:78906150	-0.219049	0.0988357	0.0266712
22	24582041	A	G	3604	22:24582041	-0.214018	0.0965742	0.0266844
7	129824051	C	T	3604	7:129824051	0.995415	0.449239	0.0267066
1	85666118	C	T	3604	1:85666118	-0.347073	0.156638	0.0267074
3	104380356	A	G	3604	3:104380356	-0.13885	0.0626646	0.026708
1	179965908	T	A	3604	1:179965908	-0.868472	0.391964	0.0267126
13	22647183	G	A	3604	13:22647183	0.136053	0.0614069	0.0267196
6	29473501	A	C	3604	6:29473501	1.50266	0.678256	0.0267276
17	39593768	G	A	3604	17:39593768	-1.14207	0.515695	0.0267856
19	45415640	G	A	3604	19:45415640	-0.251254	0.113469	0.0268082
1	152300817	A	G	3604	1:152300817	-0.131409	0.0593523	0.0268254
17	74289705	G	A	3604	17:74289705	0.131391	0.0593485	0.0268363
2	211179735	A	G	3604	2:211179735	-0.782201	0.353317	0.026837
19	8168545	C	T	3604	19:8168545	-0.285013	0.128792	0.0268989
8	120007420	A	T	3604	8:120007420	0.14638	0.0661581	0.0269272
7	117307076	C	T	3604	7:117307076	-2.46798	1.11556	0.026944
8	83669120	G	A	3604	8:83669120	-0.995611	0.450043	0.0269489
3	93991504	C	T	3604	3:93991504	-0.129923	0.058751	0.0270068
11	64815802	A	T	3604	11:64815802	-2.07954	0.940377	0.0270091
4	106317429	G	C	3604	4:106317429	-0.141339	0.0639308	0.0270487
22	42089630	A	G	3604	22:42089630	-0.355921	0.160999	0.0270561
10	64159333	T	G	3604	10:64159333	0.136839	0.0619069	0.0270777
15	95678494	T	C	3604	15:95678494	0.147949	0.0669417	0.0270968
19	47909743	A	C	3604	19:47909743	0.646324	0.292469	0.027113
12	50744119	A	G	3604	12:50744119	0.147403	0.0667148	0.0271438
20	2381041	G	A	3604	20:2381041	0.881658	0.399043	0.0271447
3	47163843	C	T	3604	3:47163843	1.00683	0.455777	0.0271719
8	131812033	G	A	3604	8:131812033	-0.141128	0.0639189	0.0272492
13	90209302	T	C	3604	13:90209302	-0.129184	0.0585126	0.0272587
8	101237471	C	T	3604	8:101237471	-0.984931	0.446179	0.0272804
16	28513376	C	A	3604	16:28513376	0.731934	0.331646	0.0273159
3	191097966	C	T	3604	3:191097966	0.135772	0.0615342	0.0273526
9	16795286	C	T	3604	9:16795286	0.573586	0.259967	0.0273573
8	86503161	A	G	3604	8:86503161	-0.129572	0.058743	0.0274016
11	57080882	C	T	3604	11:57080882	-0.504746	0.22885	0.0274134
1	180064742	G	A	3604	1:180064742	-1.28455	0.582425	0.0274177
14	51224374	G	T	3604	14:51224374	0.135993	0.0616611	0.0274196
9	22083404	T	C	3604	9:22083404	-0.144906	0.0657264	0.0274768
8	57155598	G	T	3604	8:57155598	0.32602	0.147902	0.0275038
12	50754563	G	T	3604	12:50754563	0.147193	0.0667823	0.0275191
12	131576191	C	A	3604	12:131576191	0.451024	0.204639	0.0275245
13	26367349	A	G	3604	13:26367349	0.129902	0.0589627	0.0275861
2	27995931	G	A	3604	2:27995931	0.132266	0.060042	0.0276029
8	31921721	T	C	3604	8:31921721	0.146605	0.0665607	0.027625
5	5753732	G	A	3604	5:5753732	0.130518	0.0592751	0.0276726
13	108658557	G	A	3604	13:108658557	0.131716	0.0598313	0.0277032
19	10692000	C	T	3604	19:10692000	-0.141305	0.0642024	0.0277407
2	198950240	G	A	3604	2:198950240	0.151495	0.0688326	0.0277417
1	152733376	C	G	3604	1:152733376	0.271028	0.123152	0.0277534
4	138442527	T	C	3604	4:138442527	1.353	0.614989	0.0278045
3	66436474	G	A	3604	3:66436474	2.85295	1.29682	0.0278097
19	52712828	G	A	3604	19:52712828	0.145378	0.0660859	0.0278183
17	39659913	A	G	3604	17:39659913	0.224219	0.101957	0.0278674
21	43325863	C	T	3604	21:43325863	1.43512	0.652784	0.0279167
17	11583192	C	T	3604	17:11583192	-3.15948	1.4376	0.0279678
19	31801130	G	A	3604	19:31801130	-0.131511	0.0598428	0.027977
19	33608733	A	C	3604	19:33608733	0.132241	0.0601765	0.0279806
19	10085054	G	A	3604	19:10085054	0.147892	0.067301	0.0279867
1	85311192	C	T	3604	1:85311192	1.47725	0.672283	0.0279946
1	85029077	C	T	3604	1:85029077	-0.294211	0.13394	0.0280495
1	6550376	T	C	3604	1:6550376	-0.146952	0.0669017	0.0280534
2	155226677	T	C	3604	2:155226677	0.132052	0.0601733	0.0281971
16	16205379	G	A	3604	16:16205379	-0.699965	0.319045	0.0282401
12	52215102	G	T	3604	12:52215102	0.413233	0.188401	0.0282809
8	14372503	T	C	3604	8:14372503	-0.138406	0.0631066	0.0282918
1	155028450	C	A	3604	1:155028450	-0.292226	0.133242	0.0282931
6	25727158	G	A	3604	6:25727158	-0.63704	0.290475	0.0283004
11	45924057	C	T	3604	11:45924057	7246.21	3304.24	0.028307
17	3953102	A	G	3604	17:3953102	0.14488	0.0660695	0.0283188
16	81076959	A	C	3604	16:81076959	-2.05168	0.935858	0.0283578
3	141137035	G	A	3604	3:141137035	0.179737	0.0819866	0.0283594
2	59499347	A	C	3604	2:59499347	-0.475248	0.216786	0.0283619
6	144835835	G	A	3604	6:144835835	-1.09574	0.499879	0.0283792
1	90049615	G	A	3604	1:90049615	0.285207	0.130158	0.0284343
17	72248482	C	A	3604	17:72248482	2.06647	0.943421	0.0284956
21	41363778	C	T	3604	21:41363778	-0.131199	0.0598994	0.0285007
9	18323073	G	A	3604	9:18323073	0.132291	0.0604023	0.0285126
9	18829952	A	G	3604	9:18829952	-0.425979	0.194522	0.028533
19	55693244	T	C	3604	19:55693244	-0.129231	0.0590282	0.0285737
11	132886373	T	C	3604	11:132886373	0.131749	0.0601843	0.02859
12	44124408	C	A	3604	12:44124408	-1.18868	0.543062	0.0286075
3	124646594	A	G	3604	3:124646594	-0.157224	0.0718294	0.0286077
7	122809234	T	C	3604	7:122809234	-0.138167	0.0631292	0.0286229
11	126141551	C	T	3604	11:126141551	-1.09139	0.498785	0.0286623
14	21796784	G	C	3604	14:21796784	0.132217	0.0604302	0.0286745
10	84744926	C	A	3604	10:84744926	0.39238	0.17934	0.0286759
11	58920492	C	G	3604	11:58920492	-2.46599	1.12745	0.0287265
8	118831994	G	A	3604	8:118831994	1.06637	0.487554	0.0287294
20	34572606	A	G	3604	20:34572606	-0.312196	0.142777	0.0287715
11	27563382	G	T	3604	11:27563382	0.190697	0.0872277	0.0288015
2	71860893	T	C	3604	2:71860893	0.129344	0.0591643	0.0288017
17	46894377	A	C	3604	17:46894377	-0.170423	0.0779657	0.0288252
11	34668175	C	T	3604	11:34668175	0.39994	0.182983	0.0288398
18	72108787	A	G	3604	18:72108787	-0.149084	0.0682107	0.0288421
6	30451904	T	C	3604	6:30451904	0.179115	0.0819635	0.0288663
1	201184878	C	A	3604	1:201184878	2.60995	1.19471	0.0289193
2	149838032	C	T	3604	2:149838032	-0.285334	0.130616	0.0289236
1	183086559	C	T	3604	1:183086559	0.445753	0.20418	0.0290258
12	52965173	G	T	3604	12:52965173	0.142964	0.0654892	0.0290348
9	117186681	C	T	3604	9:117186681	-2.51466	1.15197	0.0290418
11	60107105	G	A	3604	11:60107105	-0.129046	0.0591406	0.0291076
16	22161136	C	T	3604	16:22161136	0.163385	0.0748797	0.0291124
14	23002684	T	G	3604	14:23002684	-0.128632	0.0589687	0.0291561
14	29046822	A	G	3604	14:29046822	-0.128409	0.0588917	0.029226
3	129155287	T	C	3604	3:129155287	-1.95074	0.894691	0.0292318
1	201183424	G	A	3604	1:201183424	2.59534	1.1907	0.029281
1	205814497	C	T	3604	1:205814497	0.146374	0.0671556	0.0292857
1	28282292	T	C	3604	1:28282292	-0.146913	0.0674118	0.0293062
8	97978245	G	A	3604	8:97978245	2.61238	1.19892	0.0293357
1	153333264	G	A	3604	1:153333264	0.418765	0.192225	0.0293677
12	81885531	T	C	3604	12:81885531	0.128372	0.0589352	0.0293921
7	132481248	G	A	3604	7:132481248	2.00205	0.919233	0.0294094
4	20706388	A	G	3604	4:20706388	-0.734847	0.337403	0.0294097
17	38978462	C	T	3604	17:38978462	0.315332	0.144788	0.0294145
8	142359550	A	G	3604	8:142359550	0.172656	0.0792821	0.0294249
16	1961842	C	T	3604	16:1961842	1.73799	0.798119	0.0294353
1	179631242	G	A	3604	1:179631242	-0.349185	0.160354	0.0294362
8	9183358	G	A	3604	8:9183358	-0.536788	0.246547	0.0294636
8	9183596	G	A	3604	8:9183596	-0.536788	0.246547	0.0294636
17	46926615	A	G	3604	17:46926615	-0.13612	0.0625222	0.0294697
11	43955783	A	G	3604	11:43955783	-0.184003	0.0845227	0.0294832
16	84256103	C	T	3604	16:84256103	0.224104	0.102945	0.0294865
19	16601194	T	C	3604	19:16601194	-0.134343	0.0617165	0.0294971
6	30712327	G	A	3604	6:30712327	0.230345	0.105825	0.0295058
20	4680521	G	A	3604	20:4680521	-0.323923	0.148853	0.0295459
7	48452181	G	T	3604	7:48452181	-0.382072	0.175606	0.0295752
18	28141688	G	A	3604	18:28141688	-0.154769	0.0711419	0.0295927
7	122338447	C	T	3604	7:122338447	-1.56332	0.718754	0.0296273
2	196765098	G	A	3604	2:196765098	-0.401579	0.184658	0.0296511
15	42134097	T	C	3604	15:42134097	-0.139591	0.0641892	0.0296541
5	39341378	G	A	3604	5:39341378	0.859738	0.395344	0.0296558
17	19702852	C	T	3604	17:19702852	-1.03397	0.475468	0.0296579
1	55524237	A	G	3604	1:55524237	-0.807874	0.371557	0.0296831
2	74274540	C	G	3604	2:74274540	1.93178	0.888487	0.0296873
4	3473139	A	G	3604	4:3473139	0.135043	0.0621146	0.0296979
2	198511086	G	A	3604	2:198511086	0.148812	0.0684795	0.0297731
6	29489048	G	A	3604	6:29489048	-0.149965	0.0690338	0.0298297
4	2951804	A	G	3604	4:2951804	-0.165907	0.076391	0.0298694
17	1383835	C	T	3604	17:1383835	1.22565	0.564504	0.0299163
17	26086005	G	A	3604	17:26086005	9066.63	4176.93	0.0299579
11	94320374	C	T	3604	11:94320374	0.748776	0.344969	0.0299646
10	89503310	C	T	3604	10:89503310	-1.85522	0.85472	0.0299647
4	126411082	A	G	3604	4:126411082	1.56668	0.721819	0.0299722
18	6978321	C	T	3604	18:6978321	2.63226	1.21317	0.0300276
14	21215923	G	T	3604	14:21215923	-0.177695	0.0819122	0.0300575
6	32691745	C	T	3604	6:32691745	0.201556	0.0929168	0.0300669
2	24390517	A	G	3604	2:24390517	0.139672	0.0643976	0.0300901
3	58631270	C	T	3604	3:58631270	1.79814	0.82924	0.0301265
21	40465534	G	A	3604	21:40465534	0.149088	0.0687656	0.0301543
5	4874950	T	C	3604	5:4874950	0.182142	0.0840178	0.0301666
6	105573420	G	A	3604	6:105573420	-0.40354	0.186158	0.0301799
1	40312903	C	T	3604	1:40312903	0.767884	0.35424	0.0301821
14	50074122	T	A	3604	14:50074122	0.311562	0.143744	0.0301989
14	50074520	C	T	3604	14:50074520	0.311562	0.143744	0.0301989
4	44531148	G	A	3604	4:44531148	-0.129202	0.0596241	0.0302395
6	33385953	A	G	3604	6:33385953	0.298018	0.137556	0.0302716
2	194888500	A	G	3604	2:194888500	-0.13421	0.061948	0.0302737
3	137781674	C	G	3604	3:137781674	-3.11943	1.4399	0.0302792
2	86400791	T	C	3604	2:86400791	-0.227106	0.104842	0.0302976
21	43539293	G	A	3604	21:43539293	-0.148436	0.0685348	0.0303224
2	241558397	A	G	3604	2:241558397	0.132597	0.0612265	0.0303357
4	160607399	C	T	3604	4:160607399	-0.132283	0.0610826	0.0303387
3	38764998	A	G	3604	3:38764998	0.129604	0.0598525	0.0303576
11	33054958	A	G	3604	11:33054958	0.393368	0.181666	0.0303617
12	130934799	T	C	3604	12:130934799	-0.723048	0.33393	0.030367
21	45209559	C	T	3604	21:45209559	0.312543	0.144359	0.0303848
16	77323235	C	G	3604	16:77323235	-0.16104	0.074388	0.0303984
9	115651904	A	G	3604	9:115651904	0.987092	0.455979	0.0304049
20	31812206	A	G	3604	20:31812206	-0.328712	0.151882	0.0304451
3	100368546	A	G	3604	3:100368546	-0.152543	0.0704974	0.0304787
1	6530940	G	A	3604	1:6530940	-1.38626	0.640706	0.0304915
6	136565919	C	T	3604	6:136565919	1.05004	0.485498	0.0305559
1	176105631	C	G	3604	1:176105631	-0.355409	0.164362	0.0305907
22	34053443	T	C	3604	22:34053443	0.128054	0.0592264	0.0306097
1	182550360	C	T	3604	1:182550360	-0.760926	0.351991	0.0306356
6	31000489	T	C	3604	6:31000489	0.620062	0.286924	0.0306901
15	47873549	C	T	3604	15:47873549	0.14138	0.0654337	0.0307211
2	203033509	G	A	3604	2:203033509	0.128923	0.0596824	0.0307608
11	4388792	G	A	3604	11:4388792	-1.9963	0.924232	0.0307759
2	45512908	A	G	3604	2:45512908	0.129739	0.0600725	0.0307958
2	196851900	C	T	3604	2:196851900	-0.765319	0.354422	0.0308232
12	11648418	C	T	3604	12:11648418	-0.154173	0.0713984	0.0308238
17	9676115	C	G	3604	17:9676115	2.54299	1.17821	0.0309
13	54592856	A	G	3604	13:54592856	-0.127975	0.0593017	0.0309248
3	46450586	A	G	3604	3:46450586	-1.06888	0.495306	0.0309257
2	234669619	C	A	3604	2:234669619	-0.589503	0.273278	0.0309939
12	53566335	C	T	3604	12:53566335	0.671823	0.311462	0.0310057
6	33473894	G	T	3604	6:33473894	0.237029	0.109928	0.0310667
7	23737891	A	G	3604	7:23737891	0.187076	0.0867613	0.0310672
4	148288067	T	C	3604	4:148288067	-0.137841	0.063931	0.031077
5	40134777	A	G	3604	5:40134777	0.163155	0.0756732	0.0310797
9	86917301	T	C	3604	9:86917301	-0.235552	0.109299	0.0311526
1	100771636	T	C	3604	1:100771636	-0.131894	0.0612033	0.0311607
8	142505578	A	C	3604	8:142505578	-0.128898	0.059815	0.0311662
3	155200133	T	C	3604	3:155200133	1.35944	0.630903	0.0311817
1	237058835	A	G	3604	1:237058835	0.710989	0.32997	0.0311848
3	64705365	T	C	3604	3:64705365	-0.15199	0.0705395	0.0311867
3	9908888	G	A	3604	3:9908888	1.03378	0.479935	0.0312398
16	11001427	G	A	3604	16:11001427	-2.59996	1.20708	0.0312453
1	184681571	T	C	3604	1:184681571	1.19775	0.55612	0.0312588
9	111945992	T	C	3604	9:111945992	0.127884	0.0593774	0.0312598
5	159882797	A	C	3604	5:159882797	-0.13304	0.0617723	0.031262
6	33694588	C	T	3604	6:33694588	0.502222	0.233192	0.0312647
3	133538548	A	G	3604	3:133538548	0.327853	0.152238	0.0312748
9	25741077	C	T	3604	9:25741077	-0.127708	0.0593119	0.0313055
3	101451483	T	C	3604	3:101451483	1.84451	0.856771	0.0313292
19	46571668	A	C	3604	19:46571668	-0.137101	0.0636888	0.031344
7	6656830	A	G	3604	7:6656830	-0.147589	0.0685752	0.0313802
4	20709441	C	T	3604	4:20709441	-0.706227	0.328186	0.0314044
15	41820200	C	T	3604	15:41820200	-0.143204	0.0665485	0.0314069
16	73501536	T	C	3604	16:73501536	-0.151531	0.0704199	0.0314116
18	59167623	C	T	3604	18:59167623	0.333989	0.155228	0.0314284
11	35489623	G	A	3604	11:35489623	-0.969404	0.450573	0.0314375
22	19195771	G	A	3604	22:19195771	-1.09276	0.507936	0.0314462
11	23368595	C	T	3604	11:23368595	0.129566	0.0602255	0.0314489
3	175592927	G	A	3604	3:175592927	0.137025	0.0637083	0.0314909
10	1462457	T	C	3604	10:1462457	0.126048	0.0586063	0.0314953
11	134238603	G	A	3604	11:134238603	-3.35382	1.55942	0.0315012
5	492130	C	T	3604	5:492130	1.26304	0.587421	0.0315442
17	47005193	G	A	3604	17:47005193	-0.13974	0.0649989	0.031565
2	160181398	G	A	3604	2:160181398	-0.855307	0.397871	0.0315782
14	73980744	A	G	3604	14:73980744	1.11584	0.519078	0.0315821
12	121691096	G	A	3604	12:121691096	-0.142099	0.0661263	0.0316416
17	73259509	C	G	3604	17:73259509	0.746932	0.347598	0.0316471
13	33554302	A	G	3604	13:33554302	0.169235	0.0787669	0.0316699
6	112512915	C	T	3604	6:112512915	0.523844	0.243848	0.0316951
12	50727706	G	C	3604	12:50727706	0.143575	0.066836	0.031701
17	40256863	A	G	3604	17:40256863	1.01287	0.471601	0.0317358
6	33478496	G	A	3604	6:33478496	0.235953	0.109882	0.0317663
7	102113226	C	T	3604	7:102113226	-1.25177	0.582942	0.0317668
6	34823477	G	T	3604	6:34823477	1.18778	0.553202	0.0317848
8	11513313	T	C	3604	8:11513313	0.15019	0.0699505	0.0317857
11	9761797	C	T	3604	11:9761797	-2.73324	1.2733	0.0318268
4	3006043	C	T	3604	4:3006043	-0.1649	0.0768209	0.0318289
4	164532801	T	C	3604	4:164532801	-0.172497	0.0803682	0.0318464
16	22144318	T	C	3604	16:22144318	0.136084	0.063407	0.0318569
1	43898419	C	T	3604	1:43898419	-2.37658	1.10786	0.0319372
9	139849843	G	A	3604	9:139849843	0.379096	0.176725	0.0319434
3	10334546	C	T	3604	3:10334546	1.60264	0.747166	0.0319564
6	30709830	T	C	3604	6:30709830	0.27163	0.126663	0.0319925
6	42571338	C	A	3604	6:42571338	0.996434	0.464846	0.0320665
18	56204991	C	T	3604	18:56204991	0.148421	0.0692448	0.0320788
16	81030993	G	A	3604	16:81030993	-2.27007	1.05913	0.0320866
12	32860302	G	A	3604	12:32860302	0.257524	0.120189	0.0321408
8	144557739	G	A	3604	8:144557739	-0.547467	0.255535	0.0321585
6	29191411	C	A	3604	6:29191411	-0.136104	0.0635295	0.0321639
6	29274486	T	C	3604	6:29274486	-0.138102	0.0644698	0.0321834
11	66299152	A	G	3604	11:66299152	1.45113	0.677489	0.0321992
2	27501096	T	C	3604	2:27501096	-0.794715	0.37107	0.0322188
2	56144930	T	C	3604	2:56144930	-1.61053	0.752018	0.0322245
7	111368500	G	A	3604	7:111368500	1.42716	0.666618	0.0322822
2	152466337	C	T	3604	2:152466337	0.87335	0.407963	0.0322937
2	103066858	A	G	3604	2:103066858	0.129795	0.0606575	0.0323702
15	55632859	T	G	3604	15:55632859	0.140256	0.0655465	0.0323719
21	43420555	C	A	3604	21:43420555	-0.191091	0.0893061	0.0323764
1	176525970	C	G	3604	1:176525970	-2.6932	1.25871	0.0323832
6	31538244	C	G	3604	6:31538244	0.17397	0.0813137	0.0323961
18	5441359	A	G	3604	18:5441359	-0.134279	0.0627737	0.032428
1	17586134	A	G	3604	1:17586134	-0.158265	0.0739893	0.032433
5	6699224	C	T	3604	5:6699224	0.132961	0.0621643	0.0324464
10	23287216	G	A	3604	10:23287216	0.431266	0.201688	0.0324936
6	135128858	A	G	3604	6:135128858	-0.13012	0.0608567	0.0325051
7	96415055	C	T	3604	7:96415055	-0.196344	0.0918316	0.0325098
4	156651348	G	A	3604	4:156651348	-1.11663	0.522414	0.0325627
18	56205262	A	C	3604	18:56205262	0.147476	0.069002	0.0325754
8	144411609	C	G	3604	8:144411609	-0.70783	0.331273	0.0326225
19	8987218	G	T	3604	19:8987218	0.13013	0.0609102	0.0326442
20	31814277	C	T	3604	20:31814277	-0.322512	0.151002	0.0326944
9	215057	C	T	3604	9:215057	0.138169	0.0646987	0.032714
7	127999645	C	T	3604	7:127999645	0.165079	0.0773025	0.0327211
20	51871432	G	A	3604	20:51871432	-1.59577	0.747436	0.0327621
17	2279155	G	A	3604	17:2279155	0.501099	0.234795	0.0328268
1	156561651	C	G	3604	1:156561651	-0.352336	0.165132	0.0328703
5	40226919	C	T	3604	5:40226919	0.129048	0.0604862	0.032883
4	124303285	G	A	3604	4:124303285	-0.128152	0.0600707	0.032896
20	33764082	C	T	3604	20:33764082	-0.834865	0.391445	0.0329432
6	33753673	A	G	3604	6:33753673	0.165678	0.0777179	0.033024
1	19500551	C	T	3604	1:19500551	0.128343	0.0602079	0.0330347
5	79734201	T	C	3604	5:79734201	-0.682859	0.320449	0.0330936
8	9184691	C	T	3604	8:9184691	-0.512743	0.240626	0.0330995
8	9185146	C	T	3604	8:9185146	-0.512743	0.240626	0.0330995
6	30711031	C	T	3604	6:30711031	0.272135	0.127718	0.0331103
2	37227797	C	G	3604	2:37227797	0.202952	0.0952629	0.0331349
19	33247965	C	T	3604	19:33247965	-0.489068	0.22958	0.0331492
19	35435069	A	G	3604	19:35435069	0.130733	0.0613749	0.0331653
12	109017898	C	T	3604	12:109017898	-0.140592	0.0660233	0.0332182
11	57947163	G	A	3604	11:57947163	-2.29799	1.07925	0.0332333
18	56204671	A	T	3604	18:56204671	0.147322	0.0692302	0.0333365
18	56204932	T	G	3604	18:56204932	0.147322	0.0692302	0.0333365
16	20981162	T	C	3604	16:20981162	-0.164329	0.0772241	0.0333413
14	60752400	C	T	3604	14:60752400	-2.18138	1.02539	0.0333896
11	4842866	A	G	3604	11:4842866	2.40678	1.13157	0.0334254
11	63449125	C	A	3604	11:63449125	1.02737	0.483077	0.0334439
1	984947	G	A	3604	1:984947	-0.894392	0.420616	0.0334712
6	100964147	C	G	3604	6:100964147	0.137396	0.0646405	0.0335415
7	122547130	G	T	3604	7:122547130	0.129313	0.0608461	0.0335658
2	219883882	C	T	3604	2:219883882	0.830479	0.39081	0.033585
10	5781967	A	C	3604	10:5781967	-0.485226	0.228345	0.0335887
9	16435848	T	C	3604	9:16435848	-0.28407	0.133685	0.033593
10	48631327	G	A	3604	10:48631327	-0.202095	0.0951134	0.0336047
20	32738612	C	T	3604	20:32738612	0.169925	0.079985	0.0336317
16	70955079	G	A	3604	16:70955079	-0.424014	0.199602	0.0336454
6	30716117	G	T	3604	6:30716117	-0.422646	0.198973	0.0336588
6	17665479	G	C	3604	6:17665479	-0.132202	0.0622405	0.0336658
1	3683914	T	A	3604	1:3683914	-0.193784	0.0912341	0.0336677
3	80023498	T	C	3604	3:80023498	0.124509	0.058623	0.0336785
14	71600208	T	C	3604	14:71600208	-0.126729	0.0596706	0.0336856
22	22277571	A	C	3604	22:22277571	0.163223	0.0768585	0.0336967
6	31930441	T	G	3604	6:31930441	-0.136397	0.0642284	0.0337018
13	113973832	C	T	3604	13:113973832	0.18751	0.0882982	0.0337035
7	107615466	G	A	3604	7:107615466	1.50223	0.707532	0.0337367
11	24544761	T	C	3604	11:24544761	0.125531	0.0591556	0.0338342
15	58306448	T	C	3604	15:58306448	0.852751	0.401873	0.0338426
8	124268008	T	C	3604	8:124268008	-1.61821	0.762768	0.0338798
8	83542128	C	A	3604	8:83542128	-0.129191	0.0609017	0.033896
3	38357961	C	G	3604	3:38357961	0.134594	0.0634607	0.0339303
6	37451696	G	T	3604	6:37451696	0.126759	0.0597671	0.0339319
11	58295175	T	C	3604	11:58295175	-1.43128	0.674908	0.0339463
8	20347457	G	A	3604	8:20347457	0.161311	0.0760697	0.0339582
2	51453079	C	T	3604	2:51453079	0.126156	0.0594944	0.0339668
11	47464284	C	T	3604	11:47464284	2.10769	0.993989	0.0339693
1	59125683	C	T	3604	1:59125683	0.152016	0.0717042	0.0340024
4	89026109	T	C	3604	4:89026109	-0.153237	0.0723273	0.0341192
5	94230358	C	T	3604	5:94230358	-0.244943	0.115615	0.0341234
17	39620565	C	T	3604	17:39620565	0.192621	0.0909329	0.0341515
11	18422545	G	A	3604	11:18422545	1.13974	0.538088	0.0341642
6	29080386	T	C	3604	6:29080386	-0.395278	0.186734	0.0342772
8	19221664	G	C	3604	8:19221664	-0.160078	0.0756442	0.0343278
2	79761016	C	T	3604	2:79761016	-0.126668	0.059873	0.0343782
8	6690276	C	T	3604	8:6690276	0.125552	0.0593455	0.0343784
2	80529738	C	A	3604	2:80529738	-0.421591	0.199337	0.0344328
17	44974347	T	C	3604	17:44974347	-0.142475	0.0673675	0.0344391
10	66551141	T	G	3604	10:66551141	0.15316	0.0724321	0.0344694
19	46318286	G	A	3604	19:46318286	0.751602	0.355583	0.0345392
1	248309326	C	T	3604	1:248309326	1.46929	0.695123	0.0345403
1	196694290	T	C	3604	1:196694290	-2.64735	1.25252	0.034548
2	108605836	C	T	3604	2:108605836	0.134047	0.063424	0.0345573
2	220497018	G	A	3604	2:220497018	-1.97359	0.933841	0.0345658
2	79687252	C	A	3604	2:79687252	0.125355	0.0593195	0.034582
15	42361022	C	T	3604	15:42361022	2.49557	1.18096	0.0345865
15	42386630	G	T	3604	15:42386630	2.49557	1.18096	0.0345865
1	38357078	A	G	3604	1:38357078	-0.549641	0.260173	0.034635
2	219900320	T	G	3604	2:219900320	-0.335575	0.158889	0.0346864
9	18928508	G	A	3604	9:18928508	0.584137	0.276608	0.0347047
4	144060464	G	A	3604	4:144060464	0.180872	0.0856501	0.0347079
12	113425125	T	C	3604	12:113425125	1.68084	0.795962	0.0347114
22	50191485	G	A	3604	22:50191485	0.516702	0.244777	0.0347803
11	6622218	G	A	3604	11:6622218	0.438567	0.207799	0.0348119
8	145541766	G	T	3604	8:145541766	1.87226	0.887296	0.034852
21	25097234	T	C	3604	21:25097234	0.13373	0.0633859	0.0348778
19	17958777	T	C	3604	19:17958777	0.150339	0.0712793	0.0349314
5	171339	G	A	3604	5:171339	8577.94	4067.78	0.0349661
5	122531347	G	A	3604	5:122531347	0.877936	0.416462	0.0350238
1	151108137	G	T	3604	1:151108137	0.224516	0.106543	0.0350943
5	144528984	C	T	3604	5:144528984	0.131399	0.0623645	0.0351215
16	21264441	T	G	3604	16:21264441	-0.220034	0.104437	0.0351305
13	104967115	G	A	3604	13:104967115	-0.129988	0.061701	0.0351395
7	107503441	A	C	3604	7:107503441	0.130058	0.0617393	0.0351555
22	42280875	G	A	3604	22:42280875	1.36015	0.645688	0.0351594
1	34112263	C	T	3604	1:34112263	1.15221	0.546992	0.0351661
15	77832762	G	A	3604	15:77832762	0.1319	0.0626273	0.0351946
1	55509585	C	T	3604	1:55509585	-0.560124	0.265969	0.0352064
4	187629770	A	C	3604	4:187629770	-0.148494	0.070512	0.0352103
2	219543924	C	T	3604	2:219543924	-0.491459	0.233378	0.0352173
1	25570081	T	C	3604	1:25570081	0.382285	0.181536	0.0352183
1	43232562	C	G	3604	1:43232562	0.965604	0.458576	0.0352341
11	130332547	G	A	3604	11:130332547	-2.44167	1.15978	0.0352662
1	223285200	G	A	3604	1:223285200	0.449241	0.213433	0.0353061
15	51530495	G	A	3604	15:51530495	-0.145507	0.0691563	0.0353752
11	6578788	C	T	3604	11:6578788	0.511793	0.243273	0.0353977
6	32684344	G	A	3604	6:32684344	0.153678	0.0730635	0.0354354
1	64127468	C	G	3604	1:64127468	-0.166927	0.0793661	0.0354434
22	45221398	G	A	3604	22:45221398	0.458632	0.21808	0.0354616
14	77141290	C	A	3604	14:77141290	-0.124408	0.0591581	0.0354677
12	118206910	G	A	3604	12:118206910	-0.13228	0.0629068	0.0354833
5	35667268	G	A	3604	5:35667268	-2.30504	1.09621	0.0354895
12	112375990	A	C	3604	12:112375990	0.135883	0.0646357	0.0355285
7	100682565	T	G	3604	7:100682565	0.993147	0.472416	0.0355293
3	186395113	A	G	3604	3:186395113	0.131244	0.0624556	0.0356067
11	60709508	G	A	3604	11:60709508	-0.860427	0.409517	0.035634
11	64985107	G	A	3604	11:64985107	1.87543	0.892709	0.0356562
1	155007165	A	G	3604	1:155007165	0.463767	0.220774	0.0356722
6	30080496	G	A	3604	6:30080496	-0.269065	0.128102	0.0356936
20	41616510	A	G	3604	20:41616510	0.12493	0.0594804	0.0356969
12	32476727	G	A	3604	12:32476727	0.196384	0.0935104	0.0357169
1	152323132	G	T	3604	1:152323132	0.12477	0.0594139	0.0357282
2	209204243	G	A	3604	2:209204243	0.424109	0.201989	0.0357584
14	34985658	C	T	3604	14:34985658	-0.703517	0.335116	0.0357885
3	57108101	C	T	3604	3:57108101	0.631992	0.301052	0.0357924
6	36622900	C	A	3604	6:36622900	-0.167678	0.0798804	0.0358066
14	94756450	A	T	3604	14:94756450	-0.127769	0.0608707	0.0358146
3	69623188	T	G	3604	3:69623188	0.128239	0.0610965	0.0358206
4	155483914	T	C	3604	4:155483914	-0.1299	0.0618912	0.0358306
16	1634385	C	T	3604	16:1634385	-0.202437	0.0964646	0.0358557
22	26706747	C	T	3604	22:26706747	1.71309	0.816325	0.035857
5	95764963	C	T	3604	5:95764963	0.385685	0.18379	0.0358604
15	66629403	C	A	3604	15:66629403	-0.25299	0.120581	0.035898
6	127477441	T	C	3604	6:127477441	0.318653	0.151884	0.0359047
11	74880370	G	A	3604	11:74880370	-0.211657	0.100885	0.0359055
6	131277575	C	A	3604	6:131277575	0.883105	0.421028	0.0359497
4	30407029	A	G	3604	4:30407029	0.123791	0.0590298	0.0359855
15	70179400	T	C	3604	15:70179400	-0.128153	0.0611125	0.0359941
6	170862300	C	G	3604	6:170862300	0.154819	0.0738315	0.0360008
9	131830567	G	A	3604	9:131830567	0.341475	0.162861	0.0360177
20	46114027	T	C	3604	20:46114027	-0.131132	0.0625457	0.0360313
3	48677540	G	A	3604	3:48677540	1.16009	0.553387	0.0360509
12	2062075	C	T	3604	12:2062075	0.327374	0.156177	0.0360665
9	137436967	T	C	3604	9:137436967	0.126623	0.0604094	0.0360756
1	44482799	C	T	3604	1:44482799	0.988042	0.471445	0.0361023
5	55806751	G	A	3604	5:55806751	-0.123219	0.058795	0.0361057
1	161165424	A	G	3604	1:161165424	0.582333	0.277919	0.0361413
17	5347788	G	A	3604	17:5347788	2.53814	1.21156	0.0361768
17	79614938	G	A	3604	17:79614938	-0.647873	0.309271	0.0361856
19	9083143	G	A	3604	19:9083143	0.388664	0.185535	0.0361861
19	9084216	T	C	3604	19:9084216	0.388664	0.185535	0.0361861
19	9086123	A	C	3604	19:9086123	0.388664	0.185535	0.0361861
13	29670346	T	C	3604	13:29670346	0.135189	0.0645596	0.036258
11	87597790	T	C	3604	11:87597790	-0.156968	0.0749651	0.0362712
6	19739943	T	C	3604	6:19739943	0.13491	0.0644349	0.0362833
15	65623011	A	T	3604	15:65623011	0.576424	0.275347	0.0363095
22	45130997	G	A	3604	22:45130997	-3.00012	1.43321	0.0363233
6	29483968	C	T	3604	6:29483968	-0.141434	0.0675822	0.0363701
7	15742786	G	A	3604	7:15742786	0.186472	0.089116	0.036397
22	24179872	C	T	3604	22:24179872	0.870543	0.416087	0.0364194
19	55143452	C	T	3604	19:55143452	0.129575	0.0619416	0.0364488
11	62521139	T	A	3604	11:62521139	-2.28491	1.09231	0.0364553
3	194338423	T	C	3604	3:194338423	0.167124	0.0799278	0.0365336
5	115177207	T	C	3604	5:115177207	-1.50328	0.719299	0.0366247
3	50389477	T	C	3604	3:50389477	2.38493	1.14116	0.0366251
2	211456637	G	A	3604	2:211456637	0.124003	0.059341	0.0366478
15	91312426	C	T	3604	15:91312426	-1.59828	0.765092	0.0367078
2	160663522	T	C	3604	2:160663522	-1.92346	0.920895	0.0367356
3	42679555	A	G	3604	3:42679555	-1.80101	0.862326	0.0367485
13	108081712	T	C	3604	13:108081712	0.124247	0.0594932	0.0367589
5	145246085	G	T	3604	5:145246085	0.140786	0.0674127	0.0367596
6	30994470	C	G	3604	6:30994470	0.80876	0.38728	0.0367703
14	59112668	G	A	3604	14:59112668	-1.03104	0.493794	0.0367989
2	196663997	T	C	3604	2:196663997	0.133238	0.0638154	0.0368096
18	20724328	A	G	3604	18:20724328	-0.134794	0.0645716	0.0368425
7	107427322	A	C	3604	7:107427322	0.84175	0.403465	0.036951
8	11162449	C	G	3604	8:11162449	0.759905	0.364268	0.036968
9	126779494	T	C	3604	9:126779494	-0.125207	0.0600213	0.0369749
3	49200692	A	T	3604	3:49200692	-0.255426	0.122456	0.0369912
1	218860068	T	C	3604	1:218860068	0.123258	0.0590964	0.0370054
19	10291181	T	C	3604	19:10291181	-0.156544	0.0750735	0.0370508
6	33062673	G	T	3604	6:33062673	-0.127408	0.0611051	0.0370627
6	32731258	A	G	3604	6:32731258	-0.136868	0.065646	0.0370743
4	162227234	C	A	3604	4:162227234	0.12846	0.0616364	0.0371456
9	117722283	T	C	3604	9:117722283	-0.124224	0.0596205	0.0371981
12	57249600	G	A	3604	12:57249600	-0.160401	0.0769858	0.0372044
14	73132029	T	C	3604	14:73132029	0.136337	0.0654454	0.037231
6	150174278	A	C	3604	6:150174278	0.386604	0.185633	0.0372853
11	134062764	C	T	3604	11:134062764	0.49162	0.236086	0.0373083
21	47660803	A	G	3604	21:47660803	0.793358	0.381026	0.0373279
5	168180900	C	T	3604	5:168180900	0.3169	0.152205	0.0373366
6	31511857	G	A	3604	6:31511857	0.16948	0.0814032	0.037344
19	47856336	C	T	3604	19:47856336	-2.53067	1.21557	0.0373541
5	96248496	T	C	3604	5:96248496	-1.25853	0.60458	0.037374
19	6333498	G	A	3604	19:6333498	0.932427	0.447936	0.037378
5	118506685	G	A	3604	5:118506685	-0.133752	0.0642725	0.0374321
10	91143255	A	C	3604	10:91143255	-1.62389	0.780359	0.0374385
1	110163879	G	A	3604	1:110163879	0.139905	0.0672322	0.0374407
7	37436854	A	G	3604	7:37436854	0.514669	0.247362	0.0374674
7	49435299	T	C	3604	7:49435299	-0.126484	0.0607931	0.0374735
5	90000210	C	T	3604	5:90000210	-0.202115	0.0971511	0.0374872
1	228126470	A	G	3604	1:228126470	0.122299	0.0587875	0.0374927
11	102592381	C	A	3604	11:102592381	-1.34313	0.645637	0.0374957
5	90024735	A	G	3604	5:90024735	0.150251	0.0722355	0.0375244
3	38149133	G	A	3604	3:38149133	-0.833096	0.400546	0.0375345
2	242021742	T	G	3604	2:242021742	0.122458	0.0588838	0.0375578
8	17396380	G	A	3604	8:17396380	1.24281	0.597749	0.0376032
17	79612541	G	A	3604	17:79612541	-1.08577	0.52236	0.0376546
10	115381756	C	T	3604	10:115381756	-0.972282	0.467788	0.0376664
8	83724668	G	A	3604	8:83724668	-0.129176	0.0621667	0.0377195
16	2050192	G	T	3604	16:2050192	-0.303847	0.14623	0.0377217
22	31337950	T	C	3604	22:31337950	-0.177345	0.085351	0.0377249
11	2059195	T	C	3604	11:2059195	-0.123669	0.0595245	0.037744
12	42853871	G	A	3604	12:42853871	0.178393	0.0858703	0.037758
8	71012811	A	G	3604	8:71012811	0.123388	0.0593966	0.0377688
6	155596901	C	T	3604	6:155596901	0.354634	0.170726	0.0377821
3	16636054	A	G	3604	3:16636054	5526.79	2661.13	0.0378143
5	114462355	T	C	3604	5:114462355	-0.275921	0.13286	0.0378222
1	207867854	G	A	3604	1:207867854	0.578651	0.27866	0.0378432
11	116639104	G	A	3604	11:116639104	0.150063	0.0723205	0.0379887
10	105762591	G	A	3604	10:105762591	0.246375	0.118739	0.0379933
11	5193410	T	C	3604	11:5193410	-0.15641	0.0753819	0.0379951
2	169850337	G	A	3604	2:169850337	1.32763	0.639895	0.0380094
13	47243196	C	G	3604	13:47243196	1.89855	0.91509	0.0380128
9	12961631	C	A	3604	9:12961631	-0.121516	0.0585816	0.0380519
15	39844315	G	A	3604	15:39844315	0.537029	0.25891	0.0380615
7	103243894	C	T	3604	7:103243894	0.94999	0.458055	0.0380825
4	123868545	G	T	3604	4:123868545	-0.632889	0.305226	0.0381248
17	18155331	C	T	3604	17:18155331	-1.19694	0.577258	0.0381263
3	16364898	C	G	3604	3:16364898	-1.26815	0.611652	0.0381431
4	141877063	A	G	3604	4:141877063	-0.127114	0.0613156	0.0381625
3	38088279	T	C	3604	3:38088279	-0.126966	0.0612648	0.0382272
12	266265	G	A	3604	12:266265	1.76108	0.849871	0.0382489
1	93602439	A	G	3604	1:93602439	0.539555	0.260397	0.0382612
7	135242703	C	T	3604	7:135242703	1.88943	0.911928	0.0382737
6	128709493	C	T	3604	6:128709493	0.135355	0.065329	0.0382754
20	39992409	C	G	3604	20:39992409	-2.29537	1.10793	0.0382868
8	13393365	A	G	3604	8:13393365	0.122075	0.0589309	0.0383126
5	115824639	A	G	3604	5:115824639	0.349132	0.168541	0.0383127
7	157510195	C	T	3604	7:157510195	-0.125359	0.0605191	0.0383227
11	92887296	T	A	3604	11:92887296	2.33637	1.12795	0.0383265
1	59148118	A	T	3604	1:59148118	0.148953	0.0719149	0.0383357
5	141334921	C	T	3604	5:141334921	-0.139893	0.0675641	0.038404
2	26693460	C	T	3604	2:26693460	0.62245	0.300649	0.0384189
1	180243524	G	A	3604	1:180243524	-0.127032	0.06136	0.0384266
11	123778076	C	A	3604	11:123778076	-1.40253	0.677596	0.0384654
6	31778529	C	T	3604	6:31778529	0.168505	0.0814108	0.03847
22	18065385	A	C	3604	22:18065385	1.44321	0.697342	0.0384913
22	24992266	T	C	3604	22:24992266	0.128422	0.0620592	0.0385131
19	13411451	T	G	3604	19:13411451	2.62509	1.26859	0.0385174
1	109704618	G	A	3604	1:109704618	1.7941	0.86704	0.0385245
1	103216881	G	A	3604	1:103216881	0.129731	0.0627012	0.0385428
5	149500767	G	A	3604	5:149500767	-0.784494	0.379162	0.0385438
10	50224766	T	C	3604	10:50224766	0.134101	0.0648143	0.0385456
2	42557334	C	T	3604	2:42557334	-0.297157	0.143632	0.0385577
1	157773646	A	T	3604	1:157773646	-0.764872	0.369751	0.0385822
13	96190232	G	T	3604	13:96190232	0.12765	0.0617119	0.038594
4	21864975	G	A	3604	4:21864975	0.202835	0.0980784	0.0386316
4	76730195	A	G	3604	4:76730195	0.225869	0.109225	0.0386475
12	53004398	C	T	3604	12:53004398	0.858046	0.414945	0.0386539
1	36056256	G	A	3604	1:36056256	0.616627	0.298214	0.038665
15	48392165	G	A	3604	15:48392165	0.184916	0.089476	0.0387662
21	31654638	C	T	3604	21:31654638	-0.502298	0.243058	0.038774
14	51223789	T	C	3604	14:51223789	0.126355	0.0611466	0.0387884
7	140227293	A	G	3604	7:140227293	1.40028	0.677659	0.0387954
3	64527275	T	C	3604	3:64527275	-0.205003	0.0992616	0.0388968
8	2000428	G	T	3604	8:2000428	0.171001	0.0828137	0.038933
19	47589895	T	C	3604	19:47589895	0.131279	0.0635835	0.0389538
12	85449874	G	A	3604	12:85449874	-1.4902	0.721845	0.0389767
14	68265046	T	C	3604	14:68265046	-0.41741	0.202203	0.0389879
6	35479574	C	G	3604	6:35479574	0.168054	0.0814092	0.0389881
2	187692983	T	C	3604	2:187692983	-0.608047	0.294555	0.0389905
20	35060613	G	A	3604	20:35060613	1.59077	0.77089	0.0390604
1	24419574	C	T	3604	1:24419574	0.59458	0.288156	0.0390751
17	74287594	A	G	3604	17:74287594	0.122218	0.0592329	0.0390797
15	68605169	A	G	3604	15:68605169	-0.25539	0.123791	0.039106
5	140744990	G	A	3604	5:140744990	-0.670222	0.324935	0.0391477
3	38103776	G	A	3604	3:38103776	0.554915	0.269065	0.0391715
9	38396271	G	A	3604	9:38396271	-0.463153	0.224591	0.0391887
11	118486833	G	A	3604	11:118486833	-0.81285	0.394168	0.0391894
1	223905492	T	C	3604	1:223905492	2.48848	1.2069	0.0392201
3	46658712	C	T	3604	3:46658712	-2.12268	1.02971	0.0392611
22	41601385	A	G	3604	22:41601385	-0.395731	0.192011	0.0393048
7	99696316	G	A	3604	7:99696316	-2.07387	1.00628	0.0393094
15	75930199	C	T	3604	15:75930199	0.124163	0.0602527	0.039332
19	41089390	G	C	3604	19:41089390	-0.984675	0.478101	0.0394413
3	118865224	C	T	3604	3:118865224	-0.500584	0.24306	0.0394455
12	3310411	T	A	3604	12:3310411	1.12065	0.544151	0.0394517
6	33158898	C	T	3604	6:33158898	-0.127686	0.0620041	0.0394642
19	38024271	T	G	3604	19:38024271	1.53453	0.745216	0.0394771
9	71863235	A	G	3604	9:71863235	-1.07462	0.5219	0.0394889
2	87044316	A	G	3604	2:87044316	0.493302	0.239578	0.0394899
8	10469817	A	G	3604	8:10469817	0.12835	0.0623422	0.039514
15	45047402	A	G	3604	15:45047402	-1.4096	0.684904	0.0395804
10	33502357	G	A	3604	10:33502357	0.757909	0.368371	0.0396419
19	856015	G	A	3604	19:856015	0.532457	0.258884	0.0397113
9	124650611	T	C	3604	9:124650611	0.124474	0.0605221	0.0397178
15	33050423	C	T	3604	15:33050423	0.228256	0.110987	0.0397242
20	34090519	G	A	3604	20:34090519	-0.156849	0.0762747	0.0397475
2	177421669	G	A	3604	2:177421669	-0.148477	0.0722106	0.0397662
3	69988289	A	G	3604	3:69988289	1.94343	0.945197	0.0397721
1	144894611	T	C	3604	1:144894611	-0.1212	0.0589532	0.0397954
19	56320816	T	C	3604	19:56320816	-1.09661	0.533478	0.0398233
1	204197356	A	G	3604	1:204197356	0.403272	0.196195	0.0398335
16	88705398	G	A	3604	16:88705398	-2.44743	1.19127	0.0399301
19	58867597	G	A	3604	19:58867597	0.360569	0.175512	0.0399393
6	160961137	T	C	3604	6:160961137	-0.222286	0.108221	0.0399754
22	40697581	C	T	3604	22:40697581	0.122882	0.0598289	0.0399857
13	106161587	C	T	3604	13:106161587	0.119767	0.058314	0.0399916
7	103207075	C	T	3604	7:103207075	0.927134	0.451423	0.0399946
11	118516453	C	T	3604	11:118516453	0.282773	0.137691	0.0400074
7	92733975	G	A	3604	7:92733975	-0.391881	0.190911	0.0401029
19	35718938	C	T	3604	19:35718938	-0.881488	0.429454	0.0401133
11	70200500	C	T	3604	11:70200500	-0.922386	0.449531	0.0401811
1	115231254	G	A	3604	1:115231254	1.25632	0.612282	0.0401835
19	6040080	C	T	3604	19:6040080	2.43289	1.18576	0.0401944
8	17611959	T	G	3604	8:17611959	-0.153866	0.074993	0.0401947
12	31648826	T	C	3604	12:31648826	-0.124156	0.0605224	0.0402269
11	87032287	G	C	3604	11:87032287	0.147798	0.07205	0.0402356
13	74420269	C	T	3604	13:74420269	-0.518481	0.252766	0.0402444
7	23300128	G	A	3604	7:23300128	0.829101	0.404334	0.0403124
12	71139664	C	T	3604	12:71139664	-0.246362	0.120146	0.0403129
12	122674780	C	A	3604	12:122674780	-0.434706	0.212007	0.040322
7	138874416	C	G	3604	7:138874416	-0.144492	0.0705117	0.0404433
2	234565283	A	C	3604	2:234565283	-0.432423	0.211055	0.0404756
7	100072044	C	T	3604	7:100072044	-0.341788	0.166827	0.0404865
3	194373832	C	T	3604	3:194373832	0.183723	0.0897004	0.0405419
12	998365	G	T	3604	12:998365	0.137221	0.0669979	0.0405457
19	48821757	G	A	3604	19:48821757	1.14562	0.559356	0.0405498
2	64780257	A	G	3604	2:64780257	-1.86512	0.91071	0.0405611
16	15125627	G	A	3604	16:15125627	-1.50126	0.733185	0.0406006
8	42550498	T	C	3604	8:42550498	0.144322	0.0704909	0.0406207
20	62364653	G	T	3604	20:62364653	-0.67144	0.327973	0.0406342
6	33507723	A	G	3604	6:33507723	0.221221	0.108061	0.0406408
5	167915643	C	T	3604	5:167915643	-1.22069	0.596283	0.0406419
1	165667711	T	C	3604	1:165667711	0.913053	0.446062	0.040666
10	95278683	G	A	3604	10:95278683	-2.63339	1.28721	0.0407743
5	147661742	G	T	3604	5:147661742	-1.51922	0.742761	0.0408186
11	78381581	G	C	3604	11:78381581	1.86137	0.910121	0.0408358
5	1877280	A	C	3604	5:1877280	-0.137879	0.0674225	0.0408544
6	28497339	G	A	3604	6:28497339	-0.401052	0.196114	0.0408556
6	33638453	A	G	3604	6:33638453	2.64151	1.29177	0.0408664
5	9041935	A	G	3604	5:9041935	0.239554	0.117149	0.0408686
3	87110674	C	T	3604	3:87110674	0.129648	0.0634061	0.0408813
17	73221439	T	C	3604	17:73221439	0.309854	0.15156	0.0409109
13	113942301	A	G	3604	13:113942301	0.181094	0.0885791	0.0409112
2	102957716	C	T	3604	2:102957716	0.128967	0.0630865	0.0409243
12	8926119	A	G	3604	12:8926119	2.98612	1.46077	0.0409331
5	59823791	C	T	3604	5:59823791	-0.336109	0.164443	0.0409608
1	87613358	C	T	3604	1:87613358	0.157905	0.0772564	0.0409627
5	68616331	C	T	3604	5:68616331	0.136057	0.0665716	0.0409757
7	44556509	C	G	3604	7:44556509	1.07408	0.525609	0.0410024
5	98451600	T	G	3604	5:98451600	-0.161104	0.0788395	0.041009
1	186313108	C	T	3604	1:186313108	-0.273171	0.133734	0.0410876
3	8609277	G	A	3604	3:8609277	-1.14119	0.558712	0.0410981
3	9860595	G	A	3604	3:9860595	-0.442636	0.216725	0.0411135
1	14143003	G	A	3604	1:14143003	0.139045	0.0680874	0.0411358
12	33510115	G	A	3604	12:33510115	-0.128603	0.0629774	0.0411462
7	107479519	C	A	3604	7:107479519	0.12424	0.0608436	0.041156
21	16438793	G	A	3604	21:16438793	-0.128366	0.0628727	0.0411839
13	71948095	G	A	3604	13:71948095	0.122765	0.060136	0.0412055
1	152595565	C	G	3604	1:152595565	1.08567	0.531861	0.0412249
6	31336870	C	T	3604	6:31336870	-0.130572	0.0639758	0.0412552
10	99637578	A	G	3604	10:99637578	-0.128746	0.0630843	0.0412649
6	85891744	C	T	3604	6:85891744	-0.324158	0.15887	0.041311
9	131110892	G	A	3604	9:131110892	-0.15526	0.076101	0.0413317
19	15093503	C	A	3604	19:15093503	0.124692	0.0611222	0.0413459
2	108869824	T	C	3604	2:108869824	-1.71794	0.842187	0.0413651
11	119206824	C	T	3604	11:119206824	-0.521796	0.255856	0.041409
1	113657233	T	G	3604	1:113657233	0.409698	0.200898	0.0414167
18	72244208	G	A	3604	18:72244208	-0.318124	0.156013	0.0414413
3	157992814	G	A	3604	3:157992814	-0.127343	0.0624599	0.0414711
14	92987358	C	T	3604	14:92987358	-0.154775	0.0759159	0.041473
15	40675493	C	T	3604	15:40675493	0.344541	0.169007	0.0414881
6	25813093	A	C	3604	6:25813093	0.838404	0.411279	0.0414973
6	30078275	C	T	3604	6:30078275	-0.261673	0.128382	0.0415255
16	57693498	T	C	3604	16:57693498	1.68569	0.827233	0.041576
19	17330060	C	T	3604	19:17330060	0.22947	0.112643	0.0416356
14	96731073	C	T	3604	14:96731073	2.61938	1.28585	0.041642
16	24582877	G	A	3604	16:24582877	-0.810022	0.397647	0.0416461
5	171468278	A	G	3604	5:171468278	0.257897	0.126633	0.041694
9	19119674	A	G	3604	9:19119674	-0.855381	0.420021	0.041698
12	42863266	C	T	3604	12:42863266	0.170651	0.0838005	0.0417105
6	10902439	G	A	3604	6:10902439	0.121167	0.0595037	0.0417204
8	126163472	C	T	3604	8:126163472	-1.82274	0.895143	0.0417247
15	31234064	C	T	3604	15:31234064	-0.459854	0.225854	0.0417433
3	52380590	A	C	3604	3:52380590	-0.988325	0.485461	0.0417656
15	55619796	C	T	3604	15:55619796	0.122409	0.0601291	0.0417734
7	27211786	G	A	3604	7:27211786	0.826694	0.406101	0.0417818
5	173003451	C	T	3604	5:173003451	0.129131	0.0634345	0.041785
21	42729117	G	A	3604	21:42729117	-0.988744	0.485823	0.0418314
8	93201255	G	T	3604	8:93201255	-0.123611	0.0607403	0.0418434
14	105833679	A	G	3604	14:105833679	-0.648879	0.318871	0.041858
7	23728916	G	A	3604	7:23728916	0.171877	0.084474	0.0418842
6	130936249	G	A	3604	6:130936249	0.1231	0.0605063	0.0419009
1	169951997	C	T	3604	1:169951997	0.120079	0.059044	0.0419791
5	141248963	T	G	3604	5:141248963	0.290314	0.142753	0.0419835
19	12187020	G	A	3604	19:12187020	0.244758	0.120414	0.0420887
19	18497141	T	A	3604	19:18497141	0.123712	0.0608755	0.0421321
10	50534395	G	A	3604	10:50534395	0.17938	0.0882721	0.0421412
1	51826921	T	C	3604	1:51826921	-0.448187	0.220556	0.0421459
14	61180673	A	C	3604	14:61180673	0.823314	0.405224	0.042179
4	187540610	G	A	3604	4:187540610	-2.26715	1.11599	0.0422027
19	55699454	C	T	3604	19:55699454	1.41762	0.69808	0.0422813
7	47925331	G	C	3604	7:47925331	0.125598	0.061858	0.0423137
7	19036775	T	C	3604	7:19036775	1.27698	0.628933	0.0423164
12	40704252	C	T	3604	12:40704252	-1.61988	0.797818	0.042317
6	30078330	C	T	3604	6:30078330	-0.260924	0.128535	0.0423587
6	34975415	T	C	3604	6:34975415	0.121403	0.0598057	0.042361
20	34797675	G	A	3604	20:34797675	-1.17223	0.577548	0.0423903
6	31506801	G	A	3604	6:31506801	0.164238	0.0809294	0.0424172
6	35402785	G	A	3604	6:35402785	-0.14302	0.0704821	0.0424405
12	11855624	A	C	3604	12:11855624	0.120187	0.0592297	0.042441
9	8497250	T	C	3604	9:8497250	1.24806	0.615108	0.0424567
17	30348266	C	T	3604	17:30348266	1.6036	0.79035	0.0424613
16	1270162	A	G	3604	16:1270162	0.192262	0.0947643	0.0424745
15	78880752	G	A	3604	15:78880752	3.29202	1.62273	0.0424891
4	185655171	T	C	3604	4:185655171	-0.12838	0.0632866	0.0425042
18	57246293	G	T	3604	18:57246293	-0.173465	0.085512	0.0425042
1	227149153	G	A	3604	1:227149153	1.64534	0.81112	0.0425109
22	38054262	A	C	3604	22:38054262	0.118032	0.0581932	0.0425315
3	106393843	T	G	3604	3:106393843	-0.120239	0.059284	0.0425412
17	38770286	C	T	3604	17:38770286	-0.140667	0.0693564	0.0425423
11	118518751	G	A	3604	11:118518751	0.281134	0.138618	0.0425479
11	107299631	G	A	3604	11:107299631	1.33994	0.660739	0.0425665
8	70585325	G	A	3604	8:70585325	-0.506507	0.249865	0.0426497
6	29342236	A	G	3604	6:29342236	0.170785	0.0842671	0.0426915
1	43308367	T	C	3604	1:43308367	1.44225	0.711742	0.0427274
8	126493746	G	A	3604	8:126493746	0.133639	0.0659621	0.0427659
19	48994699	G	A	3604	19:48994699	0.199294	0.0983714	0.042772
12	90013089	T	C	3604	12:90013089	0.125654	0.0620236	0.0427745
6	106266373	G	A	3604	6:106266373	0.121255	0.0598711	0.0428392
3	8590329	C	T	3604	3:8590329	0.681695	0.336658	0.0428788
11	6942695	C	T	3604	11:6942695	-0.148071	0.0731498	0.0429477
17	46878711	G	A	3604	17:46878711	0.826041	0.408085	0.0429506
15	42128423	C	T	3604	15:42128423	-0.455595	0.225109	0.042982
8	121220474	G	A	3604	8:121220474	-0.88616	0.437917	0.0430135
13	39265736	A	G	3604	13:39265736	-1.9295	0.953516	0.0430146
2	102842467	T	C	3604	2:102842467	0.143915	0.0711253	0.0430315
6	33138021	G	A	3604	6:33138021	-0.125061	0.0618089	0.0430364
3	99886662	G	A	3604	3:99886662	0.339273	0.167714	0.0430811
4	169433326	T	C	3604	4:169433326	-0.154304	0.0762789	0.0430837
17	38421293	G	A	3604	17:38421293	1.04785	0.51812	0.0431348
18	5396258	G	A	3604	18:5396258	0.426494	0.210906	0.0431558
14	24653954	G	A	3604	14:24653954	0.121371	0.0600198	0.043158
2	71192103	G	A	3604	2:71192103	1.08522	0.536675	0.0431643
9	71437571	A	G	3604	9:71437571	0.297665	0.14721	0.0431719
14	65758642	A	G	3604	14:65758642	0.145317	0.0718672	0.0431741
4	168292322	G	A	3604	4:168292322	-0.120931	0.0598088	0.0431805
2	111551708	C	T	3604	2:111551708	2.11089	1.04401	0.043186
8	126507389	A	C	3604	8:126507389	0.136119	0.0673379	0.0432355
6	96053922	T	A	3604	6:96053922	0.206736	0.102301	0.043294
21	28338425	G	A	3604	21:28338425	8180.37	4048.52	0.0433228
19	17389704	G	A	3604	19:17389704	0.814777	0.403248	0.0433278
2	170493863	A	G	3604	2:170493863	0.283112	0.140118	0.0433292
1	22927836	G	A	3604	1:22927836	-1.44176	0.71363	0.0433505
14	99485572	T	C	3604	14:99485572	0.131492	0.0650887	0.0433631
6	29760462	T	C	3604	6:29760462	0.553748	0.274167	0.04341
9	78910241	A	C	3604	9:78910241	-0.196783	0.0974447	0.0434419
9	78910273	G	A	3604	9:78910273	-0.196783	0.0974447	0.0434419
8	119977792	C	G	3604	8:119977792	0.134711	0.0667081	0.0434446
6	159457034	T	C	3604	6:159457034	-0.306707	0.151885	0.0434519
11	4790396	G	A	3604	11:4790396	1.72696	0.855493	0.0435209
15	75188640	A	G	3604	15:75188640	-1.53443	0.760131	0.0435254
16	30389757	A	T	3604	16:30389757	-1.36604	0.676929	0.0435915
9	137591855	G	T	3604	9:137591855	0.267552	0.132587	0.0435981
6	97677118	G	A	3604	6:97677118	0.15291	0.0757816	0.0436152
7	150554255	G	A	3604	7:150554255	0.859144	0.425841	0.0436409
14	53513535	T	C	3604	14:53513535	-0.944226	0.468108	0.0436836
11	118509676	G	A	3604	11:118509676	0.27846	0.138166	0.0438621
19	17393015	C	T	3604	19:17393015	0.128129	0.0635851	0.0438961
20	25059442	T	C	3604	20:25059442	0.119546	0.0593353	0.0439308
5	165995262	C	A	3604	5:165995262	-0.146943	0.0729339	0.0439319
19	56329447	G	A	3604	19:56329447	0.220369	0.109383	0.0439418
20	44124523	A	G	3604	20:44124523	-0.122116	0.0606143	0.0439423
13	85610544	C	T	3604	13:85610544	0.197988	0.098295	0.0439866
17	33269648	C	G	3604	17:33269648	0.132949	0.066012	0.0440081
17	7417663	T	C	3604	17:7417663	0.120062	0.0596163	0.0440193
11	63991581	G	A	3604	11:63991581	3.20695	1.59283	0.0440766
16	89712380	G	A	3604	16:89712380	0.119286	0.0592566	0.0441111
3	12867010	C	T	3604	3:12867010	-0.581055	0.288649	0.0441128
1	183914577	C	T	3604	1:183914577	0.314101	0.156052	0.0441356
18	47379430	G	A	3604	18:47379430	-0.120807	0.0600389	0.0442051
21	33700426	T	C	3604	21:33700426	0.121649	0.0604588	0.0442091
11	111115013	C	T	3604	11:111115013	0.197619	0.0982221	0.0442243
7	140301731	T	G	3604	7:140301731	-1.54337	0.767139	0.0442353
19	11210912	C	T	3604	19:11210912	-0.801909	0.398631	0.0442562
1	42898843	G	A	3604	1:42898843	0.122662	0.060984	0.0442854
11	105886989	T	C	3604	11:105886989	0.120686	0.0600079	0.0443074
3	37357030	C	T	3604	3:37357030	-1.01879	0.506661	0.0443478
12	53722361	G	A	3604	12:53722361	1.65497	0.823063	0.0443523
2	174086160	A	G	3604	2:174086160	1.3827	0.687656	0.0443533
20	20079360	A	G	3604	20:20079360	0.740308	0.368208	0.0443708
13	113975768	T	C	3604	13:113975768	0.17912	0.0891148	0.0444317
8	135649769	G	A	3604	8:135649769	2.42549	1.20683	0.0444526
5	55034832	T	G	3604	5:55034832	0.881591	0.438717	0.0444867
19	10668673	A	G	3604	19:10668673	-0.143313	0.0713555	0.0445964
7	102760511	A	C	3604	7:102760511	0.13028	0.0648689	0.0446048
5	50812738	T	C	3604	5:50812738	-0.147521	0.073462	0.04463
12	12483764	C	T	3604	12:12483764	-0.225367	0.112237	0.0446477
6	39847198	G	A	3604	6:39847198	0.463185	0.230685	0.0446574
15	62160874	C	T	3604	15:62160874	-0.386864	0.192709	0.0446965
17	42475670	T	C	3604	17:42475670	2.45561	1.22328	0.0447067
14	96169131	A	G	3604	14:96169131	0.145427	0.0724473	0.0447133
10	116032519	A	G	3604	10:116032519	0.123313	0.0614314	0.044715
7	107224334	A	G	3604	7:107224334	2.38155	1.18644	0.044717
12	56089357	T	C	3604	12:56089357	0.246453	0.122781	0.0447217
15	66870968	C	T	3604	15:66870968	-0.133638	0.0665791	0.0447271
14	53245082	A	C	3604	14:53245082	-1.47209	0.733742	0.0448263
5	137665323	A	G	3604	5:137665323	0.122934	0.0612837	0.0448584
7	21940816	G	A	3604	7:21940816	0.890626	0.443988	0.0448599
10	33475282	C	T	3604	10:33475282	0.194909	0.0971751	0.0448832
19	19823593	A	C	3604	19:19823593	-0.795816	0.396773	0.0448858
9	95840256	A	G	3604	9:95840256	-0.159132	0.0793405	0.0448896
6	30558190	C	A	3604	6:30558190	0.52547	0.262024	0.0449175
5	102282589	C	T	3604	5:102282589	2.53317	1.26316	0.0449187
17	7698599	A	G	3604	17:7698599	-0.122494	0.061093	0.0449584
9	99580834	A	C	3604	9:99580834	-0.197798	0.0986604	0.0449801
7	47979922	G	A	3604	7:47979922	0.120078	0.0598991	0.0449978
6	17699322	G	T	3604	6:17699322	-0.124538	0.0621466	0.0450765
22	44282276	G	A	3604	22:44282276	0.212522	0.106053	0.0450777
11	45245778	G	T	3604	11:45245778	1.21866	0.608174	0.0450913
7	53103554	C	G	3604	7:53103554	-0.130996	0.0653831	0.0451215
3	119886974	G	T	3604	3:119886974	1.07323	0.535802	0.0451739
1	182772897	A	G	3604	1:182772897	0.46418	0.23175	0.0451842
7	23794029	G	A	3604	7:23794029	-0.157765	0.0787757	0.0452081
[truncated: 48,024 more rows]
